# Supplementary material for: Cardiac Function Improvement and Bone Marrow Response –: Outcome Analysis of the Randomized PERFECT Phase III Clinical Trial of Intramyocardial CD133+ Application After Myocardial Infarction
Source: PubMed Central journal article supplement — eBioMedicine. 2017 Jul 29;22:208–24. doi: 10.1016/j.ebiom.2017.07.022 (PMC5552265; doi:10.1016/j.ebiom.2017.07.022), 2017-07-29
Supplement: mmc2.pdf [file mmc2.pdf]

Supplement Figure 1

## Left Ventricular Segmentation

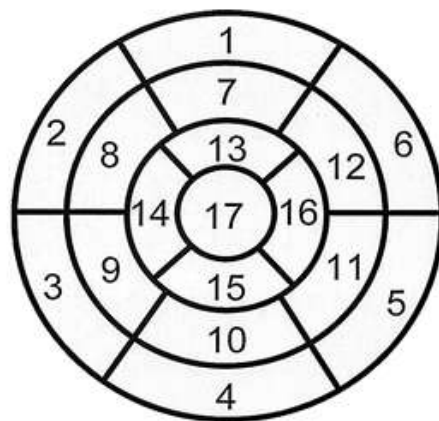

|                        |                       |                     |
|------------------------|-----------------------|---------------------|
| 1. basal anterior      | 7. mid anterior       | 13. apical anterior |
| 2. basal anteroseptal  | 8. mid anteroseptal   | 14. apical septal   |
| 3. basal inferoseptal  | 9. mid inferoseptal   | 15. apical inferior |
| 4. basal inferior      | 10. mid inferior      | 16. apical lateral  |
| 5. basal inferolateral | 11. mid inferolateral | 17. apex            |
| 6. basal anterolateral | 12. mid anterolateral |                     |

**Supplement Figure 1: Left ventricular segmentation for therapy targeting and segmental analysis**

Left ventricular segments were used for definition of target tissue (MRI at rest and stress), intraoperative target zone for treatment documentation and outcome parameters (MRI at rest and stress). Evaluation of treatment efficacy was based upon assessment of the LVEF at 6 months postoperatively versus baseline measured by MRI at rest and was the primary efficacy end-point. Cardiac MRI scan parameters recorded were: 1. LV mass ( $\text{g}/\text{m}^2$ ), body surface ( $\text{m}^2$ ), weight (kg), height (cm); 2. Left ventricular end diastolic volume (LVEDV), LVESV, LVEF (%), Scar tissue total (g), Non-viable tissue (g); 3. Ventricle function and wall motion (quality) for segments 1-17 (1=hyperkinetic, 0=normokinetic, -1=hypokinetic, -2=akinetic, -3=dyskinetic); 4. Wall motion thickening (%); 5. Regional muscle mass (g); 6. Perfusion at stress and at rest for segments 1-17; 0=normal, 1=reduced subendocardial, 2=reduced transmural; 7. Vitality/late enhancement (LE) for segments 1-17; LE volume (% LV mass), transmural LE (%); 8. Total assessment vitality for segments 1-17; 0=normal, -1=stunned, -2=hibernating, -3=infarct; 9. Unwanted tissue changes; no/yes, if yes, describe; 10. Pericardial effusion (no, few, moderate, much); 11. Pleural effusion (no, few, moderate, much); 12. Thrombus no/y

Supplement Figure 2: Flow-chart PERFECT trial

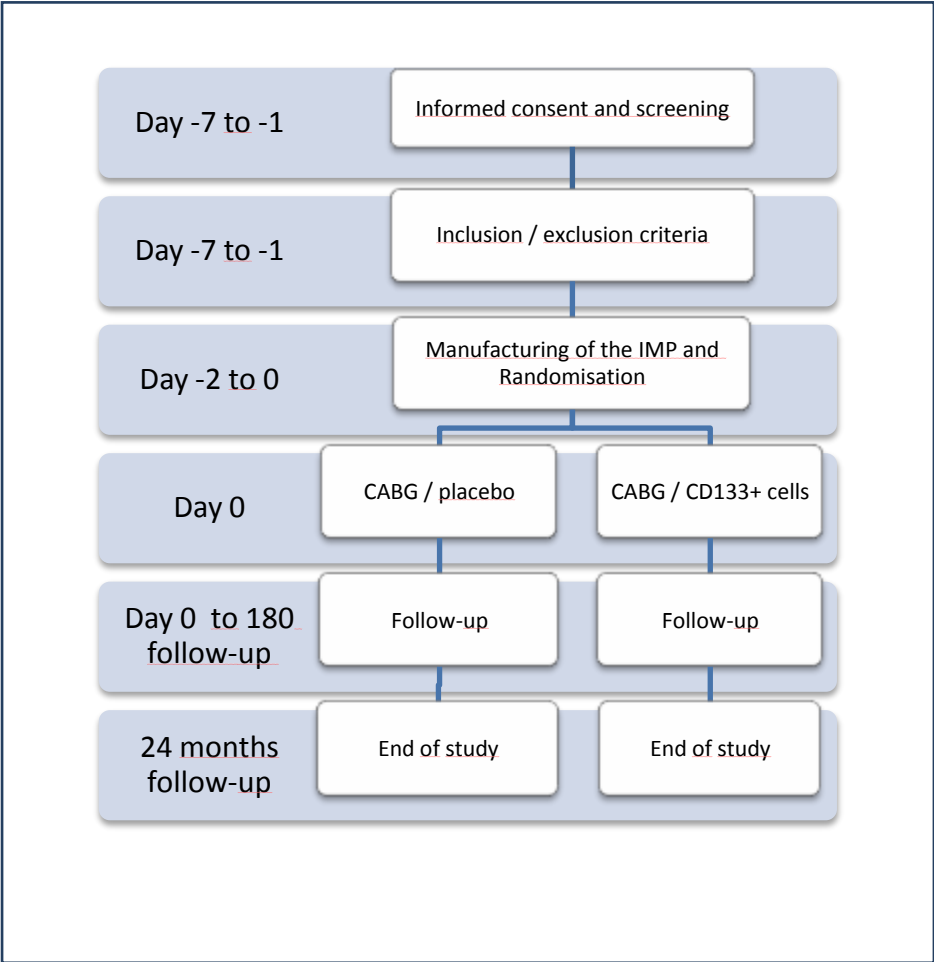

**Supplement Table 1: Stress Perfusion measured by MRI between groups**

|                                                                      | Placebo                                 | p     | p <sup>A</sup> | CD133+                                | p     | p <sup>A</sup> | Responder                                | p     | p <sup>A</sup> | Non-responder                            | p     | p <sup>A</sup> |
|----------------------------------------------------------------------|-----------------------------------------|-------|----------------|---------------------------------------|-------|----------------|------------------------------------------|-------|----------------|------------------------------------------|-------|----------------|
|                                                                      | N,Mean,SD<br>minimum<br>maximum         |       |                | N,Mean,SD<br>minimum<br>maximum       |       |                | N,Mean,SD<br>minimum<br>maximum          |       |                | N,Mean,SD<br>minimum<br>maximum          |       |                |
| Perfusion Stress Perfusion score (mean Segment 1-17) (MRI) 0         | 24, 0.80±0.33<br>0.2-1.4<br>Median 0.81 | 0.084 | 0.065          | 27, 0.86±0.42<br>0-1.6<br>Median 1.0  | 0.065 | 0.006          | 32, 0.78±0.38<br>0-1.4<br>Median: 0.81   | 0.011 | 0.004          | 19, 0.90±0.36<br>0.3-1.6<br>Median: 1.0  | 0.432 | 0.101          |
| Perfusion Stress Perfusion score (mean Segment 1-17) (MRI) 10d       | 13, 0.68±0.35<br>0.1-1.4<br>Median 0.63 |       |                | 13, 0.53±0.31<br>0-1<br>Median 0.5    |       |                | 17, 0.54±0.35,<br>0.0-1.4<br>Median 0.50 |       |                | 9, 0.74±0.42<br>0.3-1.2<br>Median 0.75   |       |                |
| Perfusion Stress Perfusion score (mean Segment 1-17) (MRI) 180d      | 24, 0.65±0.33<br>0-1.1<br>Median 0.66   |       |                | 27, 0.63±0.49<br>0-1.7<br>Median 0.44 |       |                | 32, 0.58±0.39<br>0-1.6<br>Median: 0.47   |       |                | 19, 0.73±0.51<br>0-1.6<br>Median: 0.81   |       |                |
| Perfusion Stress Perfusion score in injected segments (MRI) 0        | 24, 1.0±0.5<br>0-1.8<br>Median 1.1      | 0.045 |                | 26, 1.05±0.60<br>0-2<br>Median 1.1    | 0.006 |                | 31, 0.95±0.48<br>0-1.7<br>Median: 1.0    | 0.009 |                | 19, 1.18±0.65<br>0-2<br>Median: 1.3      | 0.034 |                |
| Perfusion Stress Perfusion score in injected segments (MRI) 180d     | 24, 0.79±0.56<br>0-2<br>Median 0.73     |       |                | 26, 0.77 ±0.66<br>0-2<br>Median 0.67  |       |                | 31, 0.71±0.52<br>0-1.8<br>Median: 0.67   |       |                | 19, 0.89±0.72<br>0-2<br>Median: 0.80     |       |                |
| Perfusion Stress Perfusion score in non-injected segments (MRI) 0    | 24, 0.63±0.41<br>0.1-1.6<br>Median 0.57 | 0.140 |                | 26, 0.73±0.44<br>0-1.5<br>Median 0.76 | 0.057 |                | 31, 0.64±0.45<br>0-1.7<br>Median: 0.64   | 0.017 |                | 19, 0.73±0.38<br>0.2-1.5<br>Median: 0.73 | 0.383 |                |
| Perfusion Stress Perfusion score in non-injected segments (MRI) 180d | 24, 0.53±0.29<br>0.1-1.1<br>Median 0.53 |       |                | 26 0.56±0.50<br>0-1.5<br>Median 0.39  |       |                | 31, 0.48±0.40<br>0-1.5<br>Median: 0.36   |       |                | 19, 0.65±0.41<br>0-1.5<br>Median: 0.67   |       |                |

SupplementTable 1: Stress Perfusion measured by MRI between groups

Statistical method: Wilcoxon-Test

p-value between 0 days / 10 days and 10 days / 6 months, p<sup>A</sup> -value between 0 days and 6 months

Perfusion score: 0- normal perfusion, 1 – hypoperfusion, 2 – strong reduced perfusion

**Supplement Table 2: Summary of adverse events during the main trial phase**

|                                                                  | CD133 <sup>+</sup> | Placebo       | Total         | p-value [1] |
|------------------------------------------------------------------|--------------------|---------------|---------------|-------------|
| pts with at least one adverse event (AE)                         | 37 (100%)          | 40 (100%)     | 77 (100%)     | 0.382       |
| number of AE                                                     | 282                | 311           | 593           | ...         |
| Patients (pts) with at least one serious adverse event (SAE)     | 19<br>(51.4%)      | 15<br>(37.5%) | 34<br>(44.2%) | 0.256       |
| number of SAEs                                                   | 25                 | 24            | 49            | ...         |
| number of Deaths                                                 | -                  | -             | -             | ...         |
| pts with at least one major adverse cardiac event (MACE)         | 1 (2.7%)           | 1 (2.5%)      | 2 (2.6%)      | 1.000       |
| number of MACEs                                                  | 1                  | 1             | 2             | ...         |
| pts with at least one adverse event s of special interest (AESI) | 32<br>(86.5%)      | 31<br>(77.5%) | 63<br>(81.8%) | 0.382       |
| number of AESIs                                                  | 67                 | 68            | 135           | ...         |
| pts with at least one AE that was at least possibly related      | 2 (5.4%)           | 7 (17.5%)     | 9 (11.7%)     | 0.156       |
| number of AEs that were at least possibly related                | 6                  | 13            | 19            | ...         |
| pts with at least one SAE that was at least possibly related     | -                  | 2 (5.0%)      | 2 (2.6%)      | 0.494       |
| number of SAEs that were at least possibly related               | -                  | 2             | 2             | ...         |
| pts with at least one AE that were not or unlikely related       | 37 (100%)          | 39<br>(97.5%) | 76<br>(98.7%) | 1.000       |
| number of AEs that were not or unlikely related                  | 276                | 298           | 574           | ...         |
| pts with at least one SAE that was not or unlikely related       | 19<br>(51.4%)      | 14<br>(35.0%) | 33<br>(42.9%) | 0.172       |
| number of SAEs that were not or unlikely related                 | 25                 | 22            | 47            | ...         |
| pts with at least one AE leading to withdrawal                   | 1 (2.7%)           | -             | 1 (1.3%)      | 0.481       |
| number of AEs leading to withdrawal                              | 1                  | -             | 1             | ...         |

Supplement Table 2: For patients (pts) denominator for percentages is column N.

Note: For severity, relation and outcome denominator for percentages is total number of AEs.

[1] Group comparison using Fishers Exact Test.

Multiple occurrences of the same adverse event in one individual counted only once

\* For multiple occurrences of the same adverse event maximal intensity is displayed

\*\* For multiple occurrences of the same adverse event 'worst case' relation is displayed

\*\*\* For multiple occurrences of the same adverse event outcome of latest AE occurrence is displayed

Source: P132\_perfect - AE01T.sas [SVN:29690] Data Extract: 15JUL2016 Generation Date : 23SEP2016 12:45

**Supplement Table 3: Serious Adverse Events during Main Trial Phase by Treatment Group and System Organ Class**

|                                                      | Placebo<br>SAEs / Subjects (%) | CD133+<br>SAEs / Subjects (%) | Total<br>SAEs / Subjects (%) | p-value [1] |
|------------------------------------------------------|--------------------------------|-------------------------------|------------------------------|-------------|
| All body systems                                     | 24 / 15 (38%)                  | 25 / 19 (51%)                 | 49 / 34 (44%)                | 0.256       |
| Cardiac disorders                                    | 8 / 7 (18%)                    | 11 / 10 (27%)                 | 19 / 17 (22%)                | 0.412       |
| Infections and infestations                          | 7 / 6 (15%)                    | 3 / 3 (8%)                    | 10 / 9 (12%)                 | 0.484       |
| Respiratory, thoracic and mediastinal disorders      | 1 / 1 (3%)                     | 3 / 3 (8%)                    | 4 / 4 (5%)                   | 0.346       |
| General disorders and administration site conditions | -                              | 3 / 3 (8%)                    | 3 / 3 (4%)                   | 0.106       |
| Injury, poisoning and procedural complications       | 1 / 1 (3%)                     | 1 / 1 (3%)                    | 2 / 2 (3%)                   | 1.000       |
| Nervous system disorders                             | -                              | 2 / 2 (5%)                    | 2 / 2 (3%)                   | 0.228       |
| Renal and urinary disorders                          | 1 / 1 (3%)                     | 1 / 1 (3%)                    | 2 / 2 (3%)                   | 1.000       |
| Blood and lymphatic system disorders                 | 1 / 1 (3%)                     | -                             | 1 / 1 (1%)                   | 1.000       |
| Eye disorders                                        | 1 / 1 (3%)                     | -                             | 1 / 1 (1%)                   | 1.000       |
| Gastrointestinal disorders                           | 1 / 1 (3%)                     | -                             | 1 / 1 (1%)                   | 1.000       |
| Reproductive system and breast disorders             | 1 / 1 (3%)                     | -                             | 1 / 1 (1%)                   | 1.000       |
| Skin and subcutaneous tissue disorders               | 1 / 1 (3%)                     | -                             | 1 / 1 (1%)                   | 1.000       |
| Surgical and medical procedures                      | -                              | 1 / 1 (3%)                    | 1 / 1 (1%)                   | 0.481       |
| Vascular disorders                                   | 1 / 1 (3%)                     | -                             | 1 / 1 (1%)                   | 1.000       |

Supplement Table : Note: Denominator for percentages is column N. Multiple occurrences of the same adverse event in one individual counted only once

Investigator Term for Adverse Events encoded using MedDRA version 15.0 [1] hGroup comparison using Fishers Exact Test. Source: P132\_perfect - AE0301T.sas [SVN:29329] Data Extract: 15JUL2016 Generation Date : 09AUG2016 11

**Supplement Table 4 Classification and outcome of the adverse events (AE) during the main trial phase**

|                                 | CD133+      | Placebo     | Total       | p-value [1] |
|---------------------------------|-------------|-------------|-------------|-------------|
| <b>Severity*</b>                |             |             |             |             |
| no AE                           | -           | 12 (3.9%)   | 12 (2.0%)   | 5.087E-04   |
| Asymptomatic                    | 77 (27.3%)  | 71 (22.8%)  | 148 (25.0%) | 0.218       |
| symptomatic, no treatment       | 71 (25.2%)  | 72 (23.2%)  | 143 (24.1%) | 0.566       |
| symptomatic, specific treatment | 128 (45.4%) | 154 (49.5%) | 282 (47.6%) | 0.324       |
| life threatening                | 6 (2.1%)    | 2 (0.6%)    | 8 (1.3%)    | 0.159       |
| N                               | 282         | 311         | 593         | ...         |
| <b>Relation**</b>               |             |             |             |             |
| not related                     | 245 (86.9%) | 264 (84.9%) | 509 (85.8%) | 0.556       |
| Unlikely                        | 31 (11.0%)  | 34 (10.9%)  | 65 (11.0%)  | 1.000       |
| Possible                        | 6 (2.1%)    | 13 (4.2%)   | 19 (3.2%)   | 0.170       |
| N                               | 282         | 311         | 593         | ...         |
| <b>Outcome***</b>               |             |             |             |             |
| recovered without sequelae      | 210 (74.5%) | 237 (76.2%) | 447 (75.4%) | 0.634       |
| recovered with sequelae         | 10 (3.5%)   | 10 (3.2%)   | 20 (3.4%)   | 0.825       |
| Persisting                      | 38 (13.5%)  | 47 (15.1%)  | 85 (14.3%)  | 0.639       |
| Unknown                         | 24 (8.5%)   | 17 (5.5%)   | 41 (6.9%)   | 0.149       |
| N                               | 282         | 311         | 593         | ...         |

Supplement Table 4: Note: For patients denominator for percentages is column N.  
Note: For severity, relation and outcome denominator for percentages is total number of AEs.  
[1] Group comparison using Fishers Exact Test.  
Multiple occurrences of the same adverse event in one individual counted only once  
\* For multiple occurrences of the same adverse event maximal intensity is displayed  
\*\* For multiple occurrences of the same adverse event 'worst case' relation is displayed  
\*\*\* For multiple occurrences of the same adverse event outcome of latest AE occurrence is displayed .  
Source: P132\_perfect - AE01T.sas [SVN:29690] Data Extract: 15JUL2016 Generation Date : 23SEP2016 12:45





**Supplement Table 5: Classification of the AEs during the main trial phase per severity, relationship to treatment and outcome by treatment group**

| AESI (according to SAP Section ) | Coded (MedDRA version 150)          | Placebo  | CD133+   | Total    | p-value [1] |
|----------------------------------|-------------------------------------|----------|----------|----------|-------------|
| AV block I, II or III            |                                     | 2 (6%)   | 3 (8%)   | 5 (7%)   | ...         |
|                                  | Atrioventricular block              | -        | 2 (5%)   | 2 (3%)   | 0.228       |
|                                  | Atrioventricular block first degree | 1 (3%)   | 1 (3%)   | 2 (3%)   | 1.000       |
|                                  | Atrioventricular block complete     | 1 (3%)   | -        | 1 (1%)   | 1.000       |
| Prolonged QT interval            |                                     | 3 (8%)   | 1 (3%)   | 4 (5%)   | ...         |
|                                  | Electrocardiogram QT prolonged      | 3 (8%)   | 1 (3%)   | 4 (5%)   | 0.616       |
| Sinus bradycardia                |                                     | 4 (10%)  | 1 (3%)   | 5 (6%)   | ...         |
|                                  | Bradycardia                         | 4 (10%)  | 1 (3%)   | 5 (6%)   | 0.360       |
| Supraventricular arrhythmia      |                                     | 16 (41%) | 19 (52%) | 35 (45%) | ...         |
|                                  | Atrial fibrillation                 | 9 (23%)  | 9 (24%)  | 18 (23%) | 1.000       |
|                                  | Supraventricular tachyarrhythmia    | 2 (5%)   | 3 (8%)   | 5 (6%)   | 0.667       |
|                                  | Arrhythmia supraventricular         | 2 (5%)   | 1 (3%)   | 3 (4%)   | 1.000       |
|                                  | Supraventricular extrasystoles      | 2 (5%)   | 1 (3%)   | 3 (4%)   | 1.000       |
|                                  | Supraventricular tachycardia        | -        | 3 (8%)   | 3 (4%)   | 0.106       |
|                                  | Atrial flutter                      | 1 (3%)   | 1 (3%)   | 2 (3%)   | 1.000       |
|                                  | Sinus tachycardia                   | -        | 1 (3%)   | 1 (1%)   | 0.481       |
| Ventricular arrhythmia           |                                     | 8 (21%)  | 6 (16%)  | 14 (17%) | ...         |
|                                  | Ventricular arrhythmia              | 2 (5%)   | 2 (5%)   | 4 (5%)   | 1.000       |
|                                  | Ventricular extrasystoles           | 2 (5%)   | 2 (5%)   | 4 (5%)   | 1.000       |
|                                  | Ventricular tachycardia             | 3 (8%)   | -        | 3 (4%)   | 0.241       |
|                                  | Tachyarrhythmia                     | 1 (3%)   | -        | 1 (1%)   | 1.000       |
|                                  | Ventricular fibrillation            | -        | 1 (3%)   | 1 (1%)   | 0.481       |
|                                  | Ventricular flutter                 | -        | 1 (3%)   | 1 (1%)   | 0.481       |
| Vasovagal syncope                |                                     | 1 (3%)   | 1 (3%)   | 2 (3%)   | ...         |
|                                  | Syncope                             | 1 (3%)   | 1 (3%)   | 2 (3%)   | 1.000       |
| Left ventricular failure         |                                     | 2 (6%)   | 3 (8%)   | 5 (7%)   | ...         |
|                                  | Cardiovascular insufficiency        | 1 (3%)   | 1 (3%)   | 2 (3%)   | 1.000       |
|                                  | Cardiac failure                     | 1 (3%)   | 2 (5%)   | 3 (4%)   | 0.606       |
| Myocardial ischemia              |                                     | 1 (3%)   | 2 (5%)   | 3 (4%)   | ...         |
|                                  | Acute myocardial infarction         | 1 (3%)   | -        | 1 (1%)   | 1.000       |
|                                  | Angina pectoris                     | -        | 2 (5%)   | 2 (3%)   | 0.228       |
| Cerebral ischemia                |                                     | -        | 2 (6%)   | 2 (6%)   | ...         |
|                                  | Cerebral infarction                 | -        | 1 (3%)   | 1 (1%)   | 0.481       |
|                                  | Cerebrovascular accident            | -        | 1 (3%)   | 1 (1%)   | 0.481       |
| Myocarditis                      |                                     | -        | -        | -        | -           |
| Pericardial effusion             |                                     | 8 (20%)  | 6 (16%)  | 14 (18%) | ...         |
|                                  | Pericardial effusion                | 8 (20%)  | 6 (16%)  | 14 (18%) | 0.772       |
| Pericarditis                     |                                     | -        | -        | -        | -           |

**Supplement Table 5: Classification of the AEs during the main trial phase per severity, relationship to treatment and outcome by treatment group**

| AESI (according to SAP Section ) | Coded (MedDRA version 15.0) | Placebo | CD133+ | Total  | p-value [1] |
|----------------------------------|-----------------------------|---------|--------|--------|-------------|
| Deep sternal wound infection     |                             | -       | -      | -      | -           |
| Other arrhythmias                |                             | 4 (11%) | 3 (8%) | 7 (9%) | ...         |
|                                  | Cardiac arrest              | 1 (3%)  | -      | 1 (1%) | 1.000       |
|                                  | Bradyarrhythmia             | 1 (3%)  | -      | 1 (1%) | 1.000       |
|                                  | Tachycardia                 | 2 (5%)  | 1 (3%) | 3 (4%) | 1.000       |
|                                  | Arrhythmia                  | -       | 2 (5%) | 2 (3%) | 0.228       |

Supplement Table 5: Multiple occurrences of the same adverse event in one individual counted only once. Denominator for percentages is column N. [1] Group comparison using Fishers Exact Test. Note: For patients denominator for percentages is column N. Note: For severity, relation and outcome denominator for percentages is total number of AEs.

[1] Group comparison using Fishers Exact Test.

Multiple occurrences of the same adverse event in one individual counted only once.

\* For multiple occurrences of the same adverse event maximal intensity is displayed.

\*\* For multiple occurrences of the same adverse event 'worst case' relation is displayed.

\*\*\* For multiple occurrences of the same adverse event outcome of latest AE occurrence is displayed.

Source: P132\_perfect - AE01T'sas [SVN:29690] Data Extract: 15JUL2016 Generation Date : 23SEP2016 12:45

**Supplement Table 6:** Responder vs. NonResponder Analysis:

| Adverse events class                           | Non-responders (n=23)<br>AEs / Subjects (%) | Responders (n=35)<br>AEs / Subjects (%) | Total<br>SAEs / Subjects (%) | p-value [1] |
|------------------------------------------------|---------------------------------------------|-----------------------------------------|------------------------------|-------------|
| All cardiac disorders                          | 15 (65%)                                    | 25 (71%)                                | 40 (69%)                     | 0·773       |
| Atrial fibrillation                            | 9 (39%)                                     | 6 (17%)                                 | 15 (26%)                     | 0·074       |
| Ventricular arrhythmia                         | 3 (13%)                                     | 0                                       | 3 (5%)                       | 0·057       |
| Cardiac failure                                | 3 (13%)                                     | 1 (3%)                                  | 4 (7%)                       | 0·290       |
| Infections and infestations                    | 8 (35%)                                     | 7 (20%)                                 | 15 (26%)                     | 0·235       |
| Lung infection                                 | 4 (17%)                                     | 0                                       | 4 (7%)                       | 0·021       |
| Injury, poisoning and procedural complications | 11 (48%)                                    | 12 (34%)                                | 23 (40%)                     | 0·412       |
| Nervous system disorders                       | 7 (30%)                                     | 4 (11%)                                 | 11 (19%)                     | 0·093       |
| Renal failure                                  | 1 (4%)                                      | 4 (11%)                                 | 5 (9%)                       | 0·639       |
| Blood and lymphatic system disorders           | 7 (30%)                                     | 6 (17%)                                 | 13 (22%)                     | 0·336       |
| Vascular disorders                             | 5 (22%)                                     | 9 (26%)                                 | 14 (24%)                     | 1·000       |

Denominator for percentages is column N. Multiple occurrences of the same adverse event in one individual counted only once. Investigator Term for Adverse Events encoded using MedDRA version 15.0 [1] Group comparison using Fishers Exact Test. Source: P132\_perfect - AE0301T.sas [SVN:29329] Data Extract: 15JUL2016 Generation Date : 09AUG2016 11:30

CLINICAL STUDY REPORT OF PERFECT 001

**Intramyocardial transplantation of bone marrow stem cells for improvement of post-infarct myocardial regeneration in addition to CABG surgery: a controlled, prospective, randomized, double blinded multicentre trial (PERFECT trial)**

Development Phase: III

Name of Investigational Drug: CD133<sup>+</sup> autologous bone marrow stem cells

Sponsor: Miltenyi Biotec GmbH  
Friedrich-Ebert-Straße 68  
51429 Bergisch Gladbach  
Germany

Sponsor Study Number: PERFECT 001 (M-2006-144)

IND/NDA number:

EudraCT number: 2006-006404-11 (DRKS, Number: DRKS00000213)

Date of first visit: 20 August 2009

Date of last visit: 10 March 2016

Date of database snapshot: 15 July 2016

Principal Investigator: Professor Dr. med. Gustav Steinhoff  
Universität Rostock  
Direktor Klinik und Poliklinik für Herzchirurgie,  
Schillingallee 35  
D-18057 Rostock  
Phone: +49 (381) 494-6100  
E-mail: [gustav.steinhoff@med.uni-rostock.de](mailto:gustav.steinhoff@med.uni-rostock.de)

Author(s): Claudia Frumento PhD, Medical Writer  
Professor Dr. Günther Kundt, Statistician  
Uta Mehdorn, Statistician

Version identification: Final 1.0 - 08 March 2017

The study was conducted in accordance with the Helsinki Declaration and Good Clinical Practice. Independent Ethics Committee approval and written informed consent were obtained before starting the study.

The information contained herein is the property Miltenyi Biotec GmbH and may not be reproduced, published or disclosed to others without written authorisation of Miltenyi Biotec GmbH

## SIGNATURE PAGE [SPONSOR]

### CLINICAL STUDY

**REPORT OF STUDY:** PERFECT 001 (M-2006-144)

**STUDY TITLE:** Intramyocardial transplantation of bone marrow stem cells for improvement of post-infarct myocardial regeneration in addition to CABG surgery: a controlled, prospective, randomized, double blinded multicentre trial (PERFECT trial)

**AUTHORS:** Claudia Frumento PhD  
Professor Dr. Günther Kundt, Statistician  
Uta Mehdorn, Statistician

| MEDICAL WRITER                           | STATISTICIAN                                                                                                                  | MEDICAL DIRECTOR                                                                       |
|------------------------------------------|-------------------------------------------------------------------------------------------------------------------------------|----------------------------------------------------------------------------------------|
| Claudia Frumento PhD                     | Prof. Dr. -Ing. Günther Kundt                                                                                                 | Dr. med. Liane Preußner                                                                |
| Teltowerstr. 35<br>14109 Berlin, Germany | Universität Rostock<br>Institut für Medizinische<br>Informatik und Biometrie<br>Rembrandtstr. 16/17<br>18057 Rostock, Germany | Miltenyi Biotec GmbH<br>Friedrich-Ebert-Str. 68<br>51429 Bergisch-Gladbach,<br>Germany |
| Signature:<br><br>Date:                  | Signature:<br><br>Date:                                                                                                       | Signature:<br><br>Date:                                                                |

## APPROVAL PAGE OF THE PRINCIPAL INVESTIGATOR

### CLINICAL STUDY

**REPORT OF STUDY:** PERFECT 001 (M-2006-144)

**STUDY TITLE:** Intramyocardial transplantation of bone marrow stem cells for improvement of post-infarct myocardial regeneration in addition to CABG surgery: a controlled, prospective, randomized, double blinded multicentre trial (PERFECT trial)

**AUTHORS:** Claudia Frumento PhD  
Professor Dr. Günther Kundt, Statistician  
Uta Mehdorn, Statistician

I have read this report and confirm that to the best of my knowledge it accurately describes the conduct and results of the study.

Professor Dr. med. Gustav Steinhoff  
Universität Rostock  
Direktor Klinik und Poliklinik für Herzchirurgie,  
Schillingallee 35  
D-18057 Rostock

Signature:

Date:

## SYNOPSIS

|                                                                                                                                                                                                                                                                                                                                                                                                                                                                                                                                                                                                                                                                                                                                                  |                                                           |                                          |
|--------------------------------------------------------------------------------------------------------------------------------------------------------------------------------------------------------------------------------------------------------------------------------------------------------------------------------------------------------------------------------------------------------------------------------------------------------------------------------------------------------------------------------------------------------------------------------------------------------------------------------------------------------------------------------------------------------------------------------------------------|-----------------------------------------------------------|------------------------------------------|
| <b>NAME OF SPONSOR</b><br>Miltenyi Biotec GmbH                                                                                                                                                                                                                                                                                                                                                                                                                                                                                                                                                                                                                                                                                                   | <b>INDIVIDUAL STUDY TABLE</b><br><b>REFERRING TO PART</b> | <b>(FOR NATIONAL AUTHORITY USE ONLY)</b> |
| <b>NAME OF FINISHED PRODUCT</b><br>CD133+ autologous bone marrow derived cells IMPD 1.1.1                                                                                                                                                                                                                                                                                                                                                                                                                                                                                                                                                                                                                                                        | <b>OF THE DOSSIER</b><br>Volume:                          |                                          |
| <b>NAME OF ACTIVE INGREDIENT</b><br>CD133+ autologous bone marrow derived cells                                                                                                                                                                                                                                                                                                                                                                                                                                                                                                                                                                                                                                                                  | Page:                                                     |                                          |
| <b>TITLE OF STUDY</b><br>Intramyocardial transplantation of bone marrow stem cells for improvement of post-infarct myocardial regeneration in addition to Coronary Artery Bypass Graft (CABG) surgery: a controlled, prospective, randomized, double blinded multicentre trial (PERFECT trial)                                                                                                                                                                                                                                                                                                                                                                                                                                                   |                                                           |                                          |
| <b>COORDINATING AND PRINCIPAL INVESTIGATOR</b><br>Prof. Dr. med. Gustav Steinhoff<br>Universität Rostock<br>Direktor Klinik und Poliklinik für Herzchirurgie, Schillingallee 35<br><b>PRINCIPAL INVESTIGATORS</b><br>Prof. Dr. med. Christof Stamm<br>Deutsches Herzzentrum Berlin<br>Prof. Dr. med. Dr. h. c. Axel Haverich<br>Medizinische Hochschule Hannover<br>Prof. Dr. med. Gustav Steinhoff<br>Universität Rostock<br>Dr. med. Jochen Börgemann<br>Herz- und Diabeteszentrum Nordrhein Westfalen<br>Prof. Dr. med. Friedrich-Wilhelm Mohr<br>Klinik für Herzchirurgie, Herzzentrum Universität Leipzig<br>PD. Dr. med. Florian Mathias Wagner<br>Klinik und Poliklinik für Herz- und Gefäßchirurgie<br>Universitäres Herzzentrum Hamburg |                                                           |                                          |
| <b>STUDY CENTERS</b><br>Deutsches Herzzentrum Berlin<br>Klinik für Herz-, Thorax- und Gefäßchirurgie<br>Augustenburger Platz 1<br>D-13353 Berlin<br>Phone: +49 (30) 4593- 2109<br>Fax: +49 (30) 4593-2100<br>E-mail: stamm@DHZB.de<br>Medizinische Hochschule Hannover<br>Klinik für Thorax-, Herz- und Gefäßchirurgie<br>Carl-Neuberg Strasse 1<br>D-30625 Hannover<br>Phone: +49 (511) 532 65 80                                                                                                                                                                                                                                                                                                                                               |                                                           |                                          |

|                                                                                                                                                                                                                                                                                                                                                                                                                                                                                                                                                                                                                                                                                                                                                                                                                                                                                                                                                                                                                                                                                                                                                                                                                                                                                                                                                                                                                   |                                                           |                                          |
|-------------------------------------------------------------------------------------------------------------------------------------------------------------------------------------------------------------------------------------------------------------------------------------------------------------------------------------------------------------------------------------------------------------------------------------------------------------------------------------------------------------------------------------------------------------------------------------------------------------------------------------------------------------------------------------------------------------------------------------------------------------------------------------------------------------------------------------------------------------------------------------------------------------------------------------------------------------------------------------------------------------------------------------------------------------------------------------------------------------------------------------------------------------------------------------------------------------------------------------------------------------------------------------------------------------------------------------------------------------------------------------------------------------------|-----------------------------------------------------------|------------------------------------------|
| <b>NAME OF SPONSOR</b><br>Miltenyi Biotec GmbH                                                                                                                                                                                                                                                                                                                                                                                                                                                                                                                                                                                                                                                                                                                                                                                                                                                                                                                                                                                                                                                                                                                                                                                                                                                                                                                                                                    | <b>INDIVIDUAL STUDY TABLE</b><br><b>REFERRING TO PART</b> | <b>(FOR NATIONAL AUTHORITY USE ONLY)</b> |
| <b>NAME OF FINISHED PRODUCT</b><br>CD133+ autologous bone marrow derived cells IMPD 1.1.1                                                                                                                                                                                                                                                                                                                                                                                                                                                                                                                                                                                                                                                                                                                                                                                                                                                                                                                                                                                                                                                                                                                                                                                                                                                                                                                         | <b>OF THE DOSSIER</b><br>Volume:                          |                                          |
| <b>NAME OF ACTIVE INGREDIENT</b><br>CD133+ autologous bone marrow derived cells                                                                                                                                                                                                                                                                                                                                                                                                                                                                                                                                                                                                                                                                                                                                                                                                                                                                                                                                                                                                                                                                                                                                                                                                                                                                                                                                   | Page:                                                     |                                          |
| <p>Fax: +49 (511) 532 5404<br/>                 E-mail: haverich.axel@mh-hannover.de</p> <p>Universität Rostock<br/>                 Klinik und Poliklinik für Herzchirurgie<br/>                 Schillingallee 35<br/>                 D-18057 Rostock<br/>                 Phone: +49 (381) 494-6100<br/>                 Fax: +49 (381) 494-6102<br/>                 E-mail: gustav.steinhoff@med.uni-rostock.de</p> <p>Herz- und Diabeteszentrum Nordrhein Westfalen<br/>                 Universitätsklinik der Ruhruniversität Bochum Georgstraße 11<br/>                 32545 Bad Oeynhausen<br/>                 Phone: +49 (5731) 97 32 47<br/>                 Fax: +49 (5731) 97 1820<br/>                 e-mail: jboergermann@hdz-nrw.de</p> <p>Klinik für Herzchirurgie<br/>                 Herzzentrum Universität Leipzig<br/>                 Strümpellstraße 39<br/>                 04289 Leipzig<br/>                 Phone: +49(341)865-1421<br/>                 Fax: +49(3 41)865-1452<br/>                 e-mail: chir@herzzentrum-leipzig.de</p> <p>Klinik und Poliklinik für Herz- und Gefäßchirurgie<br/>                 Universitäres Herzzentrum Hamburg<br/>                 Martinstr. 52<br/>                 20246 Hamburg<br/>                 Phone: +49 (40) 7410-58949<br/>                 Fax: +49 (40) 7410-57926<br/>                 e-mail: fl.wagner@uke.de</p> |                                                           |                                          |
| <b>PUBLICATION (REFERENCE)</b><br><p>Validating intramyocardial bone marrow stem cell therapy in combination with coronary artery bypass grafting, the PERFECT Phase III randomized multicentre trial: study protocol for a randomized controlled trial. Donndorf P, Kaminski A, Tiedemann G, Kundt G, Steinhoff G. 2012 Jul 2;13:99. doi: 10.1186/1745-6215-13-99.</p>                                                                                                                                                                                                                                                                                                                                                                                                                                                                                                                                                                                                                                                                                                                                                                                                                                                                                                                                                                                                                                           |                                                           |                                          |
| <b>STUDY PERIOD</b><br>Screening date of first patient in: 20 August 2009<br>Date of last patient completed: 10 March 2016<br>The study was prematurely terminated due to very slow patient recruitment                                                                                                                                                                                                                                                                                                                                                                                                                                                                                                                                                                                                                                                                                                                                                                                                                                                                                                                                                                                                                                                                                                                                                                                                           | <b>PHASE OF DEVELOPMENT</b><br>Phase III                  |                                          |



|                                                                                                                                                                                                                                                                                                                                                                                                                                                                                                                                                                                                                                                                                                                                                                                                                                                                                                                                                                                                                                                                                                                                                                                                                                                                                                                          |                                                           |                                          |
|--------------------------------------------------------------------------------------------------------------------------------------------------------------------------------------------------------------------------------------------------------------------------------------------------------------------------------------------------------------------------------------------------------------------------------------------------------------------------------------------------------------------------------------------------------------------------------------------------------------------------------------------------------------------------------------------------------------------------------------------------------------------------------------------------------------------------------------------------------------------------------------------------------------------------------------------------------------------------------------------------------------------------------------------------------------------------------------------------------------------------------------------------------------------------------------------------------------------------------------------------------------------------------------------------------------------------|-----------------------------------------------------------|------------------------------------------|
| <b>NAME OF SPONSOR</b><br>Miltenyi Biotec GmbH                                                                                                                                                                                                                                                                                                                                                                                                                                                                                                                                                                                                                                                                                                                                                                                                                                                                                                                                                                                                                                                                                                                                                                                                                                                                           | <b>INDIVIDUAL STUDY TABLE</b><br><b>REFERRING TO PART</b> | <b>(FOR NATIONAL AUTHORITY USE ONLY)</b> |
| <b>NAME OF FINISHED PRODUCT</b><br>CD133+ autologous bone marrow derived cells IMPD 1.1.1                                                                                                                                                                                                                                                                                                                                                                                                                                                                                                                                                                                                                                                                                                                                                                                                                                                                                                                                                                                                                                                                                                                                                                                                                                | <b>OF THE DOSSIER</b><br>Volume:                          |                                          |
| <b>NAME OF ACTIVE INGREDIENT</b><br>CD133+ autologous bone marrow derived cells                                                                                                                                                                                                                                                                                                                                                                                                                                                                                                                                                                                                                                                                                                                                                                                                                                                                                                                                                                                                                                                                                                                                                                                                                                          | Page:                                                     |                                          |
| <b>OBJECTIVES</b>                                                                                                                                                                                                                                                                                                                                                                                                                                                                                                                                                                                                                                                                                                                                                                                                                                                                                                                                                                                                                                                                                                                                                                                                                                                                                                        |                                                           |                                          |
| <p>Primary objective</p> <p>Determine whether injection of autologously derived bone marrow stem cells yielded a functional benefit in addition to the coronary artery bypass graft (CABG) operation as determined by left ventricular heart function (left ventricular ejection fraction [LVEF] determined with magnetic resonance imaging [MRI]).</p> <p><b>Secondary Objectives</b></p> <p>Determine the effects of an injection of autologously-derived bone marrow stem cells on physical exercise capacity, cardiac function, safety and Quality of Life (QoL).</p>                                                                                                                                                                                                                                                                                                                                                                                                                                                                                                                                                                                                                                                                                                                                                |                                                           |                                          |
| <b>METHODOLOGY</b>                                                                                                                                                                                                                                                                                                                                                                                                                                                                                                                                                                                                                                                                                                                                                                                                                                                                                                                                                                                                                                                                                                                                                                                                                                                                                                       |                                                           |                                          |
| Controlled, prospective, randomized, double blinded multicentre trial                                                                                                                                                                                                                                                                                                                                                                                                                                                                                                                                                                                                                                                                                                                                                                                                                                                                                                                                                                                                                                                                                                                                                                                                                                                    |                                                           |                                          |
| <b>NUMBER OF PATIENTS (PLANNED AND ANALYSED)</b>                                                                                                                                                                                                                                                                                                                                                                                                                                                                                                                                                                                                                                                                                                                                                                                                                                                                                                                                                                                                                                                                                                                                                                                                                                                                         |                                                           |                                          |
| <p>Analysed for safety: The safety population comprised all patients randomized into the study and treated. Safety evaluations were performed on the safety population (SAS). All comparisons were executed per group, to which the patients were randomized.</p> <p>Analysed for efficacy: The "Full Analysis Set" (FAS) following the principle of intent-to-treat (ITT) included every patient randomized and compare the patients per group to which they were randomly allocated, regardless of patients' compliance, or withdrawal from the study. Confirmatory analyses on primary efficacy end-point was to be performed on the full analysis set (FAS) patients. This intention to treat (ITT) analysis was to be considered as the primary one.</p> <p>The "Per Protocol Set" (PPS) was defined as a subset of the FAS/ITT patients who were compliant with the study protocol. The PPS consisted of all patients from the FAS/ITT group without any major protocol violation. A secondary efficacy analysis of the primary endpoint was performed based upon the PPS, to assess the sensitivity of the analysis to the choice of analysis population.</p> <p>Planned number of patients: 142<br/>                 Screened number of patients: 119<br/>                 Randomized number of patients: 82</p> |                                                           |                                          |
| <b>MAIN CRITERIA FOR INCLUSION</b>                                                                                                                                                                                                                                                                                                                                                                                                                                                                                                                                                                                                                                                                                                                                                                                                                                                                                                                                                                                                                                                                                                                                                                                                                                                                                       |                                                           |                                          |
| <b>Inclusion criteria</b>                                                                                                                                                                                                                                                                                                                                                                                                                                                                                                                                                                                                                                                                                                                                                                                                                                                                                                                                                                                                                                                                                                                                                                                                                                                                                                |                                                           |                                          |
| <ul style="list-style-type: none"> <li>• Coronary artery disease after myocardial infarction with indication for CABG surgery</li> <li>• Currently reduced global LVEF assessed at site by cardiac MRI at rest (<math>25\% \leq \text{LVEF} \leq 50\%</math>)</li> <li>• Presence of a localized akinetic/hypokinetic/hyoperfused area of LV myocardium for defining the target area</li> <li>• Informed consent of the patient</li> <li>• 18 years <math>\leq</math> Age &lt; 80 years</li> <li>• Not pregnant and not planning to become pregnant during the study. Females with childbearing potential had to provide a negative pregnancy test within 1-7 days before OP and had to be using oral or injectable contraception (non-childbearing potential is defined as post-menopausal for at least 1 year or surgical sterilization or hysterectomy at least 3 months before study start).</li> </ul>                                                                                                                                                                                                                                                                                                                                                                                                              |                                                           |                                          |

|                                                                                                                                                                                                                                                                                                                                                                                                                                                                                                                                                                                                                                                                                                                                                                                                                                                                                                                                                                                                                                                                                                                                                                                                                                                                                                                                                                                                                                                                                                                                                                                                                                                                                                                                                                                                                  |                                                           |                                          |
|------------------------------------------------------------------------------------------------------------------------------------------------------------------------------------------------------------------------------------------------------------------------------------------------------------------------------------------------------------------------------------------------------------------------------------------------------------------------------------------------------------------------------------------------------------------------------------------------------------------------------------------------------------------------------------------------------------------------------------------------------------------------------------------------------------------------------------------------------------------------------------------------------------------------------------------------------------------------------------------------------------------------------------------------------------------------------------------------------------------------------------------------------------------------------------------------------------------------------------------------------------------------------------------------------------------------------------------------------------------------------------------------------------------------------------------------------------------------------------------------------------------------------------------------------------------------------------------------------------------------------------------------------------------------------------------------------------------------------------------------------------------------------------------------------------------|-----------------------------------------------------------|------------------------------------------|
| <b>NAME OF SPONSOR</b><br>Miltenyi Biotec GmbH                                                                                                                                                                                                                                                                                                                                                                                                                                                                                                                                                                                                                                                                                                                                                                                                                                                                                                                                                                                                                                                                                                                                                                                                                                                                                                                                                                                                                                                                                                                                                                                                                                                                                                                                                                   | <b>INDIVIDUAL STUDY TABLE</b><br><b>REFERRING TO PART</b> | <b>(FOR NATIONAL AUTHORITY USE ONLY)</b> |
| <b>NAME OF FINISHED PRODUCT</b><br>CD133+ autologous bone marrow derived cells IMPD 1.1.1                                                                                                                                                                                                                                                                                                                                                                                                                                                                                                                                                                                                                                                                                                                                                                                                                                                                                                                                                                                                                                                                                                                                                                                                                                                                                                                                                                                                                                                                                                                                                                                                                                                                                                                        | <b>OF THE DOSSIER</b><br>Volume:                          |                                          |
| <b>NAME OF ACTIVE INGREDIENT</b><br>CD133+ autologous bone marrow derived cells                                                                                                                                                                                                                                                                                                                                                                                                                                                                                                                                                                                                                                                                                                                                                                                                                                                                                                                                                                                                                                                                                                                                                                                                                                                                                                                                                                                                                                                                                                                                                                                                                                                                                                                                  | Page:                                                     |                                          |
| <b>Exclusion criteria</b> <ul style="list-style-type: none"> <li>• Emergency operation</li> <li>• Presence of any moderate-severe valve heart disease requiring concomitant valve replacement or reconstruction</li> <li>• Medical History of recent resuscitation in combination with ventricular arrhythmia classified by LOWN <math>\geq</math> class II</li> <li>• Acute myocardial infarction within last 2 weeks</li> <li>• Debilitating other disease: Degenerative neurologic disorders, psychiatric disease, terminal renal failure requiring dialysis, previous organ transplantation, active malignant neoplasia, or any other serious medical condition that, in the opinion of the Investigator is likely to alter the patient's course of recovery or the evaluation of the study medication's safety</li> <li>• Impaired ability to comprehend the study information</li> <li>• Absence of written informed consent</li> <li>• Treatment with any investigational drug within the previous 30 days</li> <li>• Apparent infection (c-reactive protein [CRP] <math>\geq</math> 20 mg/L, fever <math>\geq</math> 38.5° C)</li> <li>• Contraindication for MRI scan</li> <li>• Immune compromise including Anti human immunodeficiency virus (HIV) 1/2, HBsAg, Anti-HBc-IgG, Anti hepatitis C virus (HCV), Treponema pallidum</li> <li>• Pregnant or breast feeding</li> <li>• Childbearing potential with unreliable birth control methods</li> <li>• Have previously been enrolled in this study, respectively phase I and phase II</li> <li>• Known hypersensitivity or sensitization against murine products and human-anti-mouse-antibody-titer <math>\geq</math> 1:1000</li> <li>• Contraindication to bone marrow aspiration</li> <li>• Known hypersensitivity against iron dextran</li> </ul> |                                                           |                                          |
| <b>INVESTIGATIONAL DRUG, DOSE AND MODE OF ADMINISTRATION, BATCH NUMBER</b><br>0.5-5x10 <sup>6</sup> CD133+ in 5 mL saline and serum suspension, injected intramyocardially during CABG surgery.<br>The 5 mL suspension were distributed in 15 individual 1 mL syringes (26 Gauge needle) of 0.3 mL aliquots (in total 5 mL, including up to 0.5 mL rest in syringes) and were applied within 3 minutes in the region of interest (infarction border zone) at the end of bypass surgery. No more than one injection per square centimetre could be injected.                                                                                                                                                                                                                                                                                                                                                                                                                                                                                                                                                                                                                                                                                                                                                                                                                                                                                                                                                                                                                                                                                                                                                                                                                                                      |                                                           |                                          |
| <b>REFERENCE DRUG, DOSE AND MODE OF ADMINISTRATION, BATCH NUMBER</b><br>5 mL saline plus serum solution, injected intramyocardially during CABG surgery.<br>The 5 mL suspension were distributed in 15 individual 1 mL syringes (26 Gauge needle) of 0.3 mL aliquots (in total 5 mL, including up to 0.5 mL rest in syringes) ad were applied within 3 minutes in the region of interest (infarction border zone) at the end of bypass surgery. No more than one injection per square centimetre could be injected.                                                                                                                                                                                                                                                                                                                                                                                                                                                                                                                                                                                                                                                                                                                                                                                                                                                                                                                                                                                                                                                                                                                                                                                                                                                                                              |                                                           |                                          |

|                                                                                                                                                                                                                                                                                                                                                                                                                                                                                                                                                                                                                                                                                                                                                                                                                                                                                                                                                                                                                                                                                                                                                                                                                                                                                                                                                                                                                                                 |                                                           |                                          |
|-------------------------------------------------------------------------------------------------------------------------------------------------------------------------------------------------------------------------------------------------------------------------------------------------------------------------------------------------------------------------------------------------------------------------------------------------------------------------------------------------------------------------------------------------------------------------------------------------------------------------------------------------------------------------------------------------------------------------------------------------------------------------------------------------------------------------------------------------------------------------------------------------------------------------------------------------------------------------------------------------------------------------------------------------------------------------------------------------------------------------------------------------------------------------------------------------------------------------------------------------------------------------------------------------------------------------------------------------------------------------------------------------------------------------------------------------|-----------------------------------------------------------|------------------------------------------|
| <b>NAME OF SPONSOR</b><br>Miltenyi Biotec GmbH                                                                                                                                                                                                                                                                                                                                                                                                                                                                                                                                                                                                                                                                                                                                                                                                                                                                                                                                                                                                                                                                                                                                                                                                                                                                                                                                                                                                  | <b>INDIVIDUAL STUDY TABLE</b><br><b>REFERRING TO PART</b> | <b>(FOR NATIONAL AUTHORITY USE ONLY)</b> |
| <b>NAME OF FINISHED PRODUCT</b><br>CD133+ autologous bone marrow derived cells IMPD 1.1.1                                                                                                                                                                                                                                                                                                                                                                                                                                                                                                                                                                                                                                                                                                                                                                                                                                                                                                                                                                                                                                                                                                                                                                                                                                                                                                                                                       | <b>OF THE DOSSIER</b><br>Volume:                          |                                          |
| <b>NAME OF ACTIVE INGREDIENT</b><br>CD133+ autologous bone marrow derived cells                                                                                                                                                                                                                                                                                                                                                                                                                                                                                                                                                                                                                                                                                                                                                                                                                                                                                                                                                                                                                                                                                                                                                                                                                                                                                                                                                                 | Page:                                                     |                                          |
| <b>DURATION OF TREATMENT</b><br>Not defined                                                                                                                                                                                                                                                                                                                                                                                                                                                                                                                                                                                                                                                                                                                                                                                                                                                                                                                                                                                                                                                                                                                                                                                                                                                                                                                                                                                                     |                                                           |                                          |
| <b>CRITERIA FOR EVALUATION – SAFETY ENDPOINTS</b> <ul style="list-style-type: none"> <li>Major adverse cardiovascular events (MACE - cardiac death, myocardial infarction, secondary intervention/reoperation, ventricular arrhythmia).</li> <li>Adverse Events of Specific Interest (AESI): AV-block (I, II or III), prolonged QT interval, sinus bradycardia, supraventricular arrhythmia, ventricular arrhythmia, vasovagal syncope, left ventricular failure, myocardial ischemia, cerebral ischemia, myocarditis, pericardial Effusion, pericarditis, deep sternal wound infection (or wound infection at the site of graft sampling) coded as “deep postoperative wound infection” (Meddra LLT 10074392).</li> <li>Serious Adverse Events (SAEs) and Adverse Events (AEs).</li> </ul>                                                                                                                                                                                                                                                                                                                                                                                                                                                                                                                                                                                                                                                     |                                                           |                                          |
| <b>CRITERIA FOR EVALUATION – EFFICACY ENDPOINTS</b> <p>Primary endpoint: LVEF at 6 months postoperatively, measured by MRI at rest and change in LVEF at 6 months post-OP compared with preoperatively (screening) and early postoperatively (discharge) as assessed by MRI. Cardiac MRI was established as the gold standard for determination of LV function (LVEF and LV volumes).</p> <p>Secondary endpoints:</p> <ul style="list-style-type: none"> <li>Change in LVEF at 6 months post-OP compared with preoperatively (screening) and early postoperatively (discharge) as assessed by echocardiography.</li> <li>Change in LV dimensions (left ventricular end systolic dimension [LVESD], [LVEDD]) at 6-month post-OP compared with preoperatively (screening) and early postoperatively (discharge) as assessed by echocardiography.</li> <li>Change in physical exercise capacity determined by 6-minute walk test at 6 months post-OP compared with preoperatively (screening) and early postoperatively (discharge).</li> <li>Change in New York Heart Association (NYHA) and CCS class at 6 months post-OP compared with preoperatively (screening) and early postoperatively (discharge).</li> <li>MACE (cardiac death, myocardial infarction, secondary intervention/reoperation, ventricular arrhythmia).</li> <li>QoL-score at 6 months post-OP compared with preoperatively (screening) and 3 months (telephone).</li> </ul> |                                                           |                                          |
| <b>STATISTICAL METHODS</b> <p><b>Interim Analysis (IA)</b><br/>                 An interim analysis was performed on the first 70 patients randomized, and followed-up for at least 6 months.</p> <p><b>Main Analysis (MA)</b><br/>                 When all patients included into the trial (planned: 142) had had their 6 Month Follow-up visit the main analysis was to be performed.</p> <p>In case of stopping for futility patient recruitment was to be stopped. All patients included so far were to be followed up for safety evaluation as foreseen by the protocol. All data analysis as foreseen in MA except the</p>                                                                                                                                                                                                                                                                                                                                                                                                                                                                                                                                                                                                                                                                                                                                                                                                              |                                                           |                                          |

|                                                                                           |                                                           |                                          |
|-------------------------------------------------------------------------------------------|-----------------------------------------------------------|------------------------------------------|
| <b>NAME OF SPONSOR</b><br>Miltenyi Biotec GmbH                                            | <b>INDIVIDUAL STUDY TABLE</b><br><b>REFERRING TO PART</b> | <b>(FOR NATIONAL AUTHORITY USE ONLY)</b> |
| <b>NAME OF FINISHED PRODUCT</b><br>CD133+ autologous bone marrow derived cells IMPD 1.1.1 | <b>OF THE DOSSIER</b><br>Volume:                          |                                          |
| <b>NAME OF ACTIVE INGREDIENT</b><br>CD133+ autologous bone marrow derived cells           | Page:                                                     |                                          |

confirmatory statistical test were to be performed based on the data of those patients enrolled so far at the time point when all patients enrolled so far were followed for at least 6 months.

**Safety-Follow-up-Analysis (SFUA)**

A Safety-Follow-up-Analysis was to be performed at the time point when the last patient was followed up for additional 18 months and her/his 24-month visit was performed and data are included into the database.

In case of stopping the trial the SFUA was to be performed when all patients enrolled so far had their 24-month safety follow-up visit.

**Sample Size**

Sample size determination was done under the assumption of a two-sided type I error ( $\alpha$ ) at 5% and a type II error ( $\beta$ ) at 10% (i.e. a power at 90%). The scenario of a difference in LVEF at month 6 post-operatively between the two treatment arms of about 4 to 5 was considered as a clinical relevant difference. With a difference of 4.5 and a standard deviation of 7.5, at least n=60 patients per group were considered necessary and with an additional 15% drop-out rate a total of at least 142 patients were to be randomized.

**SAFETY RESULTS**

**Summary of Adverse Events**

- The occurrence rate of MACE was very low when compared with the occurrence reported in the literature for patients undergoing CABG surgery (26.9%). With a p-value of 1.000, there was no difference in the occurrence of MACE between the two groups of patients (1 MACE in the placebo group and 1 MACE in the CD133+ group).
- In the AESIs analysis no statistically significant differences could be observed between both treatment groups indicating that the AESIs were related either with the CABG surgery or the underlying disease (67 AESIs in the placebo group and 68 AESIs in the treatment group);
- During the main trial phase, there were 49 SAEs, 25 (15 patients) in the placebo group and 24 (19 patients) in the CD133+ group. There were no statistical differences observed between the placebo and the CD 133+ group neither overall nor in any of the system organ classes. The most common SAEs were cardiac disorders followed by infections and infestations and respiratory, thoracic and mediastinal disorders. There were no SAEs considered related with the treatment in the CD133+ group.
- In total, there were 619 AEs during the study. Twenty-six AEs during the screening phase and 593 AEs during the main trial phase. There were no statistical differences between the placebo and the CD133+ group, neither overall nor in any of the categories in which the patients or AEs were classified.
- All patients experienced at least one AE during the main trial phase. Overall, there were 19 AEs and two SAEs that were at least possibly related. There were no deaths during the screening nor the main trial phase.

## EFFICACY RESULTS

### Primary Efficacy

With p-values of 0,8130 and 0,4454 for Visit III and Visit V respectively in the FAS/ITT and p-values of 0,6771 and 0,4261 for Visit III and Visit V respectively in the PPS, the difference between the treatments groups is not statistically significant. The probability of not having detected a possible positive effect of the therapy (injection of CD133+ in the myocardium) on the improvement of LVEF is very small.

Though there were no statistical tests performed with the following endpoints, the following was observed:

- Unadjusted values of LVEF measured by MRI revealed a larger increase in the patients treated with CD133+. In the FS/ITT, baseline LVEF for the placebo group was 35,1 compared to 42.5 at Visit V and for the treatment group it was 32.7 at baseline versus 44.1 at Visit V.
- Mean values of scar tissue in the FAS/ITT measured by MRI were less in the CD133+ group than in the placebo group (27.0 versus 37.3) and in the PPS were also less in the CD133+ group than in the placebo group (27.9 versus 34.8).
- Mean values of non-viable tissue in the FAS/ITT measured by MRI were less in the CD133+ group than in the placebo group (20.0 versus 30.2) and in the PPS were also less in the CD133+ group than in the placebo group (20.7 versus 28.0).

### Secondary Efficacy

The secondary efficacy analysis was only a descriptive analysis of the variables and no tests were done regarding possible differences between the placebo and the active treatment group. The following was observed:

- The poor quality of the echocardiographies did not allow any conclusions nor a comparison with the MRI results. Since the two previous studies used the LVEF measured with echocardiography as a primary endpoint, it was decided to use this same method for the secondary endpoints to be able to compare with the previous studies.
- The 6MWT showed the following changes (Visit V-Visit 1) in the mean values: in the FAS/ITT (49.3 for the placebo group and 59.4 in the treatment group. In the PPS, these changes were 50.7 for the placebo group and 56.1 in the treatment group.
- Minimal changes in NYHA class and CCS were observed after surgery plus placebo or active treatment. Mean difference of the NYHA in the placebo and treatment group was -0.7 in the FAS/ITT and in the PPS the mean differences were -0.7 in the placebo group and -0.8 in the treatment group. Mean difference of the CCS in the placebo group was -1.4 in the treatment group was -1.0 in the FAS/ITT and in the PPS the mean differences were -1.4 in the placebo group and -0.9 in the treatment group.
- The occurrence rate of MACE was very low when compared with the occurrence reported in the literature for patients undergoing CABG surgery (26.9%). With a p-value of 1, there was no difference in the occurrence of MACE between the two groups of patients (1 MACE in the placebo group and 1 MACE in the CD133+ group). There were no changes in the EQ-5D - mobility index
- The EQ-5D VAS showed some changes in the mean value: in the FAS/ITT (6.1 for the placebo group and 11.1 in the treatment group. In the PPS, these changes were 4.4 for the placebo group and 16.4 in the treatment group. It should be noted that the increase of the index indicates an improvement of the condition.
- The MLHF-Q total score showed changes in the mean value: in the FAS/ITT (-14.7 for the placebo group and -8.6 in the treatment group. In the PPS, these changes were -16.1 for the placebo group and -10.1 in the treatment group. It should be noted that a negative change in the index indicates an improvement of the condition.

## CONCLUSIONS

The procedure was demonstrated to be safe, showing a low incidence of SAEs and MACEs when compared to the SAEs and MACEs in other trials.

Overall, the LVEF increase in the total population (placebo and treatment group) was clinically significant (FAS/ITT: 9,5%; PPS: 9,6%), however the study could not demonstrate a positive effect of the CD133 injection in the LVEF 6 months after surgery.

## VERSION IDENTIFICATION

FINAL 1.0 – 08 MARCH 2017

## Appendix 2: Design and course of the PERFECT trial (ClinicalTrials.gov identifier: NCT00950274)

|                                                                                                                                                                                                                                                                                                                                                                                                                                                                                                                                                                                                                                                                                                                                                                                                                                                                                                                                                                                                                                                                                                                                                                                                                                                                                                                                                                                                                                                                                                                                                                                                                                       |
|---------------------------------------------------------------------------------------------------------------------------------------------------------------------------------------------------------------------------------------------------------------------------------------------------------------------------------------------------------------------------------------------------------------------------------------------------------------------------------------------------------------------------------------------------------------------------------------------------------------------------------------------------------------------------------------------------------------------------------------------------------------------------------------------------------------------------------------------------------------------------------------------------------------------------------------------------------------------------------------------------------------------------------------------------------------------------------------------------------------------------------------------------------------------------------------------------------------------------------------------------------------------------------------------------------------------------------------------------------------------------------------------------------------------------------------------------------------------------------------------------------------------------------------------------------------------------------------------------------------------------------------|
| <p><b>Inclusion criteria:</b></p> <p>Coronary artery disease after myocardial infarction with indication for CABG surgery<br/>Currently reduced global LVEF assessed at site by cardiac MRI at rest (<math>25\% \leq \text{LVEF} \leq 50\%</math>)<br/>Presence of a localized akinetic/hypokinetic/hyoperfused area of LV myocardium for defining the target area<br/>Informed consent of the patient<br/>18 years <math>\leq</math> Age &lt; 80 years<br/>Are not pregnant and do not plan to become pregnant during the study..</p>                                                                                                                                                                                                                                                                                                                                                                                                                                                                                                                                                                                                                                                                                                                                                                                                                                                                                                                                                                                                                                                                                                |
| <p><b>Exclusion criteria:</b></p> <p>Emergency operation<br/>Presence of any moderate-severe valvular heart disease requiring concomitant valve replacement or reconstruction<br/>Medical History of recent resuscitation in combination with ventricular arrhythmia classified by LOWN <math>\geq</math> class II<br/>Acute myocardial infarction within last 2 weeks<br/>Debilitating other disease: Degenerative neurologic disorders, psychiatric disease, terminal renal failure requiring dialysis, previous organ transplantation, active malignant neoplasia, or any other serious medical condition that, in the opinion of the Investigator is likely to alter the patient's course of recovery or the evaluation of the study medication's safety<br/>Impaired ability to comprehend the study information<br/>Absent informed written consent<br/>Treatment with any investigational drug within the previous 30 days<br/>Apparent infection (c-reactive protein [CRP] <math>\geq 20</math> mg/L, fever <math>\geq 38.5^\circ</math> C)<br/>Contraindication for MRI scan<br/>Immune compromise including active infection with Hepatitis B, C, HIV virus or seropositivity for Treponema pallidum<br/>Pregnant or breast feeding<br/>Childbearing potential with unreliable birth control methods<br/>Have previously been enrolled in this study, respectively phase I and phase II<br/>Known hypersensitivity or sensitization against murine products and human-anti-mouse-antibody-titer <math>\geq 1:1000</math><br/>Contraindication to bone marrow aspiration<br/>Known hypersensitivity against iron dextran</p> |
| <p><b>Prespecified outcomes</b></p> <p><b>Primary Outcome Measures:</b></p> <p>Left ventricular ejection fraction at rest, measured by MRI [ Time Frame: 6 months ]<br/>[ Designated as safety issue: No ]</p>                                                                                                                                                                                                                                                                                                                                                                                                                                                                                                                                                                                                                                                                                                                                                                                                                                                                                                                                                                                                                                                                                                                                                                                                                                                                                                                                                                                                                        |
| <p><b>Secondary Outcome Measures:</b></p> <p>Change in LVEF as assessed by MRI and echocardiography [ Time Frame: early postoperatively and 6 months ]<br/>[ Designated as safety issue: No ]</p> <p>Regional contractility in the AOI / Change in LV dimensions<sup>1</sup> (left ventricular end systolic diameter [LVESD], left ventricular end diastolic diameter [LVEDD]) as assessed by echocardiography [ Time Frame: early postoperatively (discharge), 6 months ] [ Designated as safety issue: No ]</p> <p>Physical exercise capacity determined by 6 minute walk test [ Time Frame: early postoperatively (discharge), 6 months ] [ Designated as safety issue: No ]</p> <p>NYHA and CCS class [ Time Frame: early postoperatively (discharge), 6 months ]<br/>[ Designated as safety issue: No ]</p> <p>MACE (cardiac death, myocardial infarction, secondary intervention/reoperation, ventricular arrhythmia)<br/>[ Time Frame: 6 months ] [ Designated as safety issue: Yes ]</p> <p>QoL-score<sup>2</sup>: Minnesota Living with Heart Failure Questionnaire, SF36 Questionnaire, EQ-5D Questionnaire<br/>[ Time Frame: 3 months, 6 months post-OP ] [ Designated as safety issue: No ]</p>                                                                                                                                                                                                                                                                                                                                                                                                                           |

**Recruitment period**

Enrollment: 82

Study Start Date: July 2009

First-patient-in: October 2009

Last-patient-completed: March 10, 2016

Estimated study completion date: March 2018

Primary completion date: March 8, 2017 (final data collection date for primary outcome measure)

**Interim analysis**

An interim efficacy analysis was performed on the FAS/ITT analysis population. Certain demographic and baseline parameters were presented in summary or frequency tables as specified below as well as reasons for exclusion from SAS. Besides the evaluation of the primary endpoint the following secondary endpoints were evaluated based on the FAS/ITT population:

- Change in LVEF at 6 months post-OP compared with preoperatively (screening) assessed by echocardiography
- Change in physical exercise capacity determined by 6-minute walk test at 6 months compared with preoperatively
- Change in NYHA and CCS class at 6 months post-OP compared with preoperatively
- MACE (cardiac death, myocardial infarction, secondary intervention/reoperation, ventricular arrhythmia).

**Results of the interim analysis**

In total, 35 patients were treated with the test product and 35 patients were treated with placebo.

The interim primary efficacy analysis (LVEF at Visit V) indicated that there was a statistically significant difference between the treatment group and the placebo group (mean LVEFs 40.44 vs. 44.94;  $p=0.026$ ).

The interim efficacy analysis of the secondary endpoints LVEF-, 6MWT-, NYHA- and CCS-change did not show remarkable group differences.

It was decided to continue the study until completion of enrolment.

**Criteria for stop of patient recruitment**

Patient recruitment was stopped on 12th November 2015 when 82 (40 in the test product group, 40 in the placebo group, and 2 randomized but no treated) instead of the planned 142 evaluable patients were included in the trial. Due to this lower number of patients several changes to the planned analysis were considered.

The most relevant change was:

The trial was conducted at six study sites. Since there were more than 20 patients recruited in only two centres and the other centres recruited less than 10 patients each, it was decided not do a per centre analysis.

**Appendix 3: List of biomarkers, analytical methods and units.**

| Bio-marker                                         | Bio-logical sample       | Time points | Method / Technology / Assay               | Additional Method details / crucial points                                                                                                                                                                                                                                                                                                                                         | Analysis / formula / standardization                                                                                                                                                                                                                                                             | Unit | Reference                                                                                                                                          |
|----------------------------------------------------|--------------------------|-------------|-------------------------------------------|------------------------------------------------------------------------------------------------------------------------------------------------------------------------------------------------------------------------------------------------------------------------------------------------------------------------------------------------------------------------------------|--------------------------------------------------------------------------------------------------------------------------------------------------------------------------------------------------------------------------------------------------------------------------------------------------|------|----------------------------------------------------------------------------------------------------------------------------------------------------|
| Total and living cell number of CD133 <sup>+</sup> | BM CD133 <sup>+</sup> SC | ASS I       | Magnetic isolation<br>1                   | Before cell isolation an aliquot of filtered undiluted BM was taken for quality control analysis via flow cytometric measurements (see below) to determine numbers of living cells in the source material. The isolation process was performed as described (Skorska <i>et al.</i> , 2017).                                                                                        | Total number of nucleated cells was determined using 3% Acetic Acid with Methylene Blue (STEMCELL™ Technologies Inc.). Living cells in MACS-purified CD133 <sup>+</sup> SC suspension was determined using trypan blue dye(0.4 %, Sigma-Aldrich) and hemocytometer chamber (Marienfeld-Superior) |      | Skorska <i>et al.</i> , 2017                                                                                                                       |
| Viability                                          | BM CD133 <sup>+</sup> SC | ASS I       | Flow cytometry: Quality Control (QC)<br>2 | <p>Compensation was established using single stained controls and gating was performed with matched isotype/fluorescence minus one (FMO) controls.</p> <p>An adapted Boolean gating strategy for CD133<sup>+</sup> cells was arranged on the basis of the International Society of Hematotherapy and Graft Engineering (ISHAGE) guidelines for CD34<sup>+</sup> cell analysis.</p> |                                                                                                                                                                                                                                                                                                  | [%]  | ISHAGE Guidelines (Sutherland <i>et al.</i> , 1996), internal Boolean gating strategy (Mueller <i>et al.</i> , 2016, Skorska <i>et al.</i> , 2017) |



|                                                                                                           |                               |              |                                                                                                                                                                                                                                                                                                                                                                                                                                                                                                                      |                                                                                                                                                                                                                                                       |            |  |
|-----------------------------------------------------------------------------------------------------------|-------------------------------|--------------|----------------------------------------------------------------------------------------------------------------------------------------------------------------------------------------------------------------------------------------------------------------------------------------------------------------------------------------------------------------------------------------------------------------------------------------------------------------------------------------------------------------------|-------------------------------------------------------------------------------------------------------------------------------------------------------------------------------------------------------------------------------------------------------|------------|--|
| <p>Frequency of the viable CD45<sup>dim</sup> CD34<sup>+</sup>CD133<sup>+</sup> cells (=target cells)</p> |                               |              | <p>Following exclusion of dead CD45<sup>+</sup> leukocytes (R1 to R2), region containing positive CD34 cells with low expression of CD45 antigen (CD45<sup>dim</sup>) and with blast morphology (FSC/SSC plot) were chosen. Further gating strategy for enumeration of the CD133<sup>+</sup> target cells was made in the same manner as for the interim CD34<sup>+</sup> analysis.</p> <p>Frequency of the target cells among all leukocytes:</p> <p>Frequency of the target cells among all viable leukocytes:</p> | $= \frac{(\text{viable CD45}^+ \text{ events}(R2))}{(\text{CD45}^+ \text{ events}(R1))} \times 100 \%$<br>$= \frac{(\text{viable CD45}^{\text{dim}} \text{ CD34}^+ \text{ CD133}^+ (R6))}{(R1)} \times 100 \%$<br>$= \frac{(R6)}{(R2)} \times 100 \%$ |            |  |
| <p>Frequency of the viable CD45<sup>dim</sup> CD34<sup>+</sup> (CD133<sup>-</sup>) cells</p>              | <p>un-diluted filtered BM</p> | <p>ASS I</p> | <p>Frequency of CD133<sup>+</sup> SC among all leukocytes:</p> <p>Frequency of the target cells among all viable leukocytes:</p>                                                                                                                                                                                                                                                                                                                                                                                     | $= \frac{(\text{viable CD45}^{\text{dim}} \text{ CD34}^+ \text{ CD133}^-)}{(R1)} \times 100 \%$<br>$= \frac{(\text{viable CD45}^{\text{dim}} \text{ CD34}^+ \text{ CD133}^-)}{(R2)} \times 100 \%$                                                    | <p>[%]</p> |  |
| <p>Frequency of the viable CD45<sup>dim</sup> CD133<sup>+</sup> cells</p>                                 |                               |              | <p>Frequency of CD133<sup>+</sup> SC among all leukocytes:</p> <p>Frequency of the target cells among all viable leukocytes:</p>                                                                                                                                                                                                                                                                                                                                                                                     | $= \frac{(\text{viable CD45}^{\text{dim}} \text{ CD133}^+ (= R6 \text{ IHG } 133))}{(R1)} \times 100 \%$<br>$= \frac{(R6 \text{ IHG } 133)}{(R2)} \times 100 \%$                                                                                      |            |  |

|                                                                                           |                          |           |                                                                                                                                |                                                                                                                                                                                                                                                                                                                                                                    |                                                                                                                                                                                                |     |                                                              |     |
|-------------------------------------------------------------------------------------------|--------------------------|-----------|--------------------------------------------------------------------------------------------------------------------------------|--------------------------------------------------------------------------------------------------------------------------------------------------------------------------------------------------------------------------------------------------------------------------------------------------------------------------------------------------------------------|------------------------------------------------------------------------------------------------------------------------------------------------------------------------------------------------|-----|--------------------------------------------------------------|-----|
| Frequency of the viable CD45 <sup>dim</sup> CD34 <sup>-</sup> (CD133 <sup>+</sup> ) cells |                          |           |                                                                                                                                | Frequency of CD133 <sup>+</sup> SC among all leukocytes:<br><br>Frequency of the target cells among all viable leukocytes:                                                                                                                                                                                                                                         | $= \frac{(\text{viable CD45}^{\text{dim}}\text{CD34}^-\text{CD133}^+)}{(R1)} \times 100 \%$<br><br>$= \frac{(\text{viable CD45}^{\text{dim}}\text{CD34}^-\text{CD133}^+)}{(R2)} \times 100 \%$ |     |                                                              |     |
| CD34 <sup>+</sup> CD133 <sup>+</sup> (CD117 <sup>+</sup> )                                | BM CD133 <sup>+</sup> SC | ASS I     | Flow cytometry<br>Stemness characterization (2x7-fold staining)<br>3                                                           | Frequency of each subset was determined within CD45 <sup>dim</sup> CD34 <sup>+</sup> CD133 <sup>+</sup> (=R6) region in accordance with an internal adapted protocol (ISHAGE).<br><br>Frequency of viable CD117 <sup>+</sup> cells was determined within CD45 <sup>dim</sup> CD34 <sup>+</sup> CD133 <sup>+</sup> (R6) region in accordance with ISHAGE guidelines | $= \frac{(\text{viable CD117}^+\text{events})}{(\text{viable CD45}^{\text{dim}}\text{CD34}^+\text{CD133}^+ (R6))} \times 100 \%$                                                               | [%] | Laupheimer <i>et al.</i> , 2014;<br>Lux <i>et al.</i> , 2015 |     |
| CD34 <sup>+</sup> CD133 <sup>+</sup> (CD309 <sup>+</sup> )                                |                          |           |                                                                                                                                | Frequency of viable CD309 <sup>+</sup> cells was determined within R6 region in accordance with ISHAGE guidelines                                                                                                                                                                                                                                                  | $= \frac{(\text{viable CD309}^+\text{events})}{(R6)} \times 100 \%$                                                                                                                            |     |                                                              |     |
| CD34 <sup>+</sup> CD133 <sup>+</sup> (CD184 <sup>+</sup> )                                |                          |           |                                                                                                                                | Frequency of viable CD184 <sup>+</sup> cells was determined within R6 region in accordance with ISHAGE guidelines                                                                                                                                                                                                                                                  | $= \frac{(\text{viable CD184}^+\text{events})}{(R6)} \times 100 \%$                                                                                                                            |     |                                                              | [%] |
| CD34 <sup>+</sup> CD133 <sup>+</sup> (CD117 <sup>+</sup> CD309 <sup>+</sup> )             |                          |           |                                                                                                                                | Frequency of viable CD117 <sup>+</sup> CD309 <sup>+</sup> was determined within R6 region in accordance with ISHAGE guidelines                                                                                                                                                                                                                                     | $= \frac{(\text{viable CD117}^+\text{CD309}^+\text{events})}{(R6)} \times 100 \%$                                                                                                              |     |                                                              |     |
| CD34 <sup>+</sup> CD133 <sup>+</sup> (CD117 <sup>+</sup> CD184 <sup>+</sup> )             | BM CD133 <sup>+</sup> SC | ASS I     | Frequency of viable CD117 <sup>+</sup> CD184 <sup>+</sup> was determined within R6 region in accordance with ISHAGE guidelines | $= \frac{(\text{viable CD117}^+\text{CD184}^+\text{events})}{(R6)} \times 100 \%$                                                                                                                                                                                                                                                                                  |                                                                                                                                                                                                |     |                                                              |     |
| CD34 <sup>+</sup> CD133 <sup>+</sup> (CD14 <sup>+</sup> )                                 |                          |           | Frequency of viable CD14 <sup>+</sup> was determined within R6 region in accordance with ISHAGE guidelines                     | $= \frac{(\text{viable CD14}^+\text{events})}{(R6)} \times 100 \%$                                                                                                                                                                                                                                                                                                 |                                                                                                                                                                                                |     |                                                              |     |
| Total cell count of                                                                       | PB                       | ASS I-III | Density gradient centrifugation                                                                                                |                                                                                                                                                                                                                                                                                                                                                                    | Total number of living MNC was determined using Neubauer chamber and trypan blue dye.                                                                                                          | [1/ | Donndorf <i>et al.</i> , 2015                                |     |

|                     |        |               |                                                                                                                                                                  |                                                                                                                                                                                                                                                                                                                                                                                                                                                                                                                                                                                                                                                                                                                                                                                                                                                                                                                                                                                      |                                                                                                                                                                                                                                                                                                                                                                                                                                                                                                                                                                                                                                                                                                                                                                                                                                                                                  |            |  |
|---------------------|--------|---------------|------------------------------------------------------------------------------------------------------------------------------------------------------------------|--------------------------------------------------------------------------------------------------------------------------------------------------------------------------------------------------------------------------------------------------------------------------------------------------------------------------------------------------------------------------------------------------------------------------------------------------------------------------------------------------------------------------------------------------------------------------------------------------------------------------------------------------------------------------------------------------------------------------------------------------------------------------------------------------------------------------------------------------------------------------------------------------------------------------------------------------------------------------------------|----------------------------------------------------------------------------------------------------------------------------------------------------------------------------------------------------------------------------------------------------------------------------------------------------------------------------------------------------------------------------------------------------------------------------------------------------------------------------------------------------------------------------------------------------------------------------------------------------------------------------------------------------------------------------------------------------------------------------------------------------------------------------------------------------------------------------------------------------------------------------------|------------|--|
| living<br>MNC       |        | 4             |                                                                                                                                                                  |                                                                                                                                                                                                                                                                                                                                                                                                                                                                                                                                                                                                                                                                                                                                                                                                                                                                                                                                                                                      |                                                                                                                                                                                                                                                                                                                                                                                                                                                                                                                                                                                                                                                                                                                                                                                                                                                                                  | mL]<br>[n] |  |
| Subpopu-<br>lations | MNC PB | ASS I-<br>III | <p>Flow cytometry staining</p> <p>Phenotypic characterization of endothelial progenitor (EPC) and circulating endothelial (CEC) cell subpopulations</p> <p>5</p> | <p>Beside the Cytometer Setup &amp; Tracking (CS&amp;T) beads used for a daily cytometer performance, using a single staining of <math>0.5 \times 10^5</math> mononuclear cells (MNC) the compensation for each patient was optimal adjusted. At each time point <math>1 \times 10^6</math> cells were applied for multiple color staining (in each case for EPC and CEC probe) and for unstained probe.</p> <p>Generally, the optimal setting for gating was performed on the basis of FMO staining. The list of antibodies added to the respective multicolor staining either of EPC or CEC panel is shown separately below.</p> <p>CAVE:</p> <p>Number of events of each subpopulation was taken from the flow cytometric analysis performed in accordance with ISHAGE Guidelines; for calculation: total cell number of viable MNC was obtained using trypan blue dye and hemocytometer chamber and normalized per mL of peripheral blood was used (double-platform method).</p> | <p>Two different interpretations of the raw data were conducted:</p> <p>1) the gating strategy was done as for BM (please see the 7-fold staining description above) in accordance with ISHAGE guidelines and the relative frequencies were generated,</p> <p>2) frequencies of only single subpopulations were generated within viable CD45<sup>+</sup> region.</p> <p>List of subpopulations determined using flow cytometry and the respective formula used for calculation their concentrations per mL of peripheral blood applied are shown below.</p> <p>Concentrations of the respective subpopulations were generated as in formula shown. The fixed formula defined as “A” and “B” are:</p> $A = \frac{\text{total cell number of mononuclear cells determined with Trypan blue}}{\text{total volume of peripheral blood [mL]}}$ $B = \frac{\text{'living events'}}{A}$ |            |  |

|                                         |        |           |                                                                  |                                                                                                                                                                |                                                                                                                                                                                                                                                                                                                   |                                                                                                                                                            |  |     |
|-----------------------------------------|--------|-----------|------------------------------------------------------------------|----------------------------------------------------------------------------------------------------------------------------------------------------------------|-------------------------------------------------------------------------------------------------------------------------------------------------------------------------------------------------------------------------------------------------------------------------------------------------------------------|------------------------------------------------------------------------------------------------------------------------------------------------------------|--|-----|
| CD34 <sup>+</sup>                       | MNC PB | ASS I-III | Flow cytometry<br>Panel: Endothelial progenitor cells (EPC)<br>6 | CAVE: Number of events was taken from flow cytometric analysis (accordingly with ISHAGE)                                                                       | $\frac{(\# \text{viable CD45}^{\text{dim}} \text{CD34}^+ \text{ backgate events})}{B}$ $\frac{(\text{viable CD45}^{\text{dim}} \text{CD34}^+ \text{ backgate events})}{(\text{living events})} \times 100 \%$                                                                                                     | [1 / mL PB]                                                                                                                                                |  |     |
|                                         |        |           |                                                                  | Concentration of CD34 <sup>+</sup> cell subpopulation per 1 mL peripheral blood.                                                                               |                                                                                                                                                                                                                                                                                                                   |                                                                                                                                                            |  | [%] |
| CD34 <sup>+</sup><br>CD133 <sup>+</sup> |        |           |                                                                  | Concentration of CD133 <sup>+</sup> cell subpopulation per 1mL peripheral blood.                                                                               | $\frac{\# \text{viable CD45}^{\text{dim}} \text{CD34}^+ \text{CD133}^+ \text{ backgate events}}{B}$ $\frac{(\# \text{viable CD45}^{\text{dim}} \text{CD34}^+ \text{CD133}^+ \text{ backgate events})}{(\text{living events})} \times 100 \%$                                                                      |                                                                                                                                                            |  |     |
|                                         |        |           |                                                                  | Frequency of CD34 <sup>+</sup> CD133 <sup>+</sup> cell subpopulation within the living cells.                                                                  |                                                                                                                                                                                                                                                                                                                   |                                                                                                                                                            |  |     |
| CD117 <sup>+</sup>                      | MNC PB | ASS I-III |                                                                  | Concentration of CD117 <sup>+</sup> cell subpopulation per 1mL peripheral blood.                                                                               | $\frac{\# \text{viable CD45}^{\text{dim}} \text{CD117}^+ \text{ backgate events}}{B}$ $\frac{(\# \text{viable CD45}^{\text{dim}} \text{CD34}^+ \text{CD133}^+ \text{ backgate events})}{(\# \text{living events})} \times 100 \%$                                                                                 | [1 / mL PB]                                                                                                                                                |  |     |
|                                         |        |           |                                                                  |                                                                                                                                                                |                                                                                                                                                                                                                                                                                                                   |                                                                                                                                                            |  |     |
| CD45_PB_EPC_IHG                         | MNC PB | ASS I-III |                                                                  | Frequency of viable CD45 <sup>+</sup> cell subpopulation estimated within the viable MNC (data taken from analysis made on the basis of the ISHAGE guidelines) | $\frac{(\text{viable CD45}^+ \text{ events})}{(\text{living events})} \times 100 \%$ $\frac{(\# \text{living events})}{(\# \text{all events})} \times 100 \%$ $\frac{(\# \text{viable CD45}^{\text{dim}} \text{CD34}^+ \text{CD133}^+ (\text{CD184}^+) \text{ events})}{(\# \text{living events})} \times 100 \%$ | [%]                                                                                                                                                        |  |     |
| Liv_PB_EPC_IHG                          |        |           |                                                                  |                                                                                                                                                                |                                                                                                                                                                                                                                                                                                                   | Frequency of all viable cells estimated within all MNC (data taken from analysis made on the basis of the ISHAGE guidelines)                               |  |     |
| CD34_133_184_PB_EPC_IHG                 |        |           |                                                                  |                                                                                                                                                                |                                                                                                                                                                                                                                                                                                                   | Frequency of the CD184 <sup>+</sup> cell subpopulation within viable CD34 <sup>+</sup> CD133 <sup>+</sup> region (estimated according to the ISHAGE rules) |  |     |

|                         |        |           |                                                                                                                                                            |                                                                                                                                                  |     |
|-------------------------|--------|-----------|------------------------------------------------------------------------------------------------------------------------------------------------------------|--------------------------------------------------------------------------------------------------------------------------------------------------|-----|
| CD34_133_117_PB_EPC_IHG |        |           | Frequency of the CD117 <sup>+</sup> cell subpopulation within viable CD34 <sup>+</sup> CD133 <sup>+</sup> region (estimated according to the ISHAGE rules) | $\frac{(\# \text{ viable CD45}^{dim} \text{ CD34}^+ \text{ CD133}^+ (\text{CD117}^+) \text{ events})}{(\# \text{ living events})} \times 100 \%$ |     |
| CD34_133_309_PB_EPC_IHG |        |           | Frequency of the CD309 <sup>+</sup> cell subpopulation within viable CD34 <sup>+</sup> CD133 <sup>+</sup> region (estimated according to the ISHAGE rules) | $\frac{(\# \text{ viable CD45}^{dim} \text{ CD34}^+ \text{ CD133}^+ (\text{CD309}^+) \text{ events})}{(\# \text{ living events})} \times 100 \%$ |     |
| CD34_PB_EPC_IHG         |        |           | Frequency of the viable CD34 <sup>+</sup> region (estimated according to the ISHAGE rules)                                                                 | $\frac{(\# \text{ viable CD45}^{dim} \text{ CD34}^+ \text{ events})}{(\# \text{ living events})} \times 100 \%$                                  |     |
| CD34_184_PB_EPC_IHG     |        |           | Frequency of the CD184 <sup>+</sup> cell subpopulation within viable CD34 <sup>+</sup> region (estimated according to the ISHAGE rules)                    | $\frac{(\# \text{ viable CD45}^{dim} \text{ CD34}^+ (\text{CD184}^+) \text{ events})}{(\# \text{ living events})} \times 100 \%$                 |     |
| CD34_117_PB_EPC_IHG     |        |           | Frequency of the CD117 <sup>+</sup> cell subpopulation within viable CD34 <sup>+</sup> region (estimated according to the ISHAGE rules)                    | $\frac{(\# \text{ viable CD45}^{dim} \text{ CD34}^+ (\text{CD117}^+) \text{ events})}{(\# \text{ living events})} \times 100 \%$                 |     |
| CD34_309_PB_EPC_IHG     |        |           | Frequency of the CD309 <sup>+</sup> cell subpopulation within viable CD34 <sup>+</sup> region (estimated according to the ISHAGE rules)                    | $\frac{(\# \text{ viable CD45}^{dim} \text{ CD34}^+ (\text{CD309}^+) \text{ events})}{(\# \text{ living events})} \times 100 \%$                 |     |
| CD117_PB_EPC_IHG        | MNC PB | ASS I-III | Frequency of the viable CD117 <sup>+</sup> region (estimated according to the ISHAGE rules)                                                                | $\frac{(\# \text{ viable CD45}^{dim} \text{ CD117}^+ \text{ events})}{(\# \text{ living events})} \times 100 \%$                                 | [%] |
| CD117_184_PB_EPC_IHG    |        |           | Frequency of the CD184 <sup>+</sup> cell subpopulation within viable CD117 <sup>+</sup> region (estimated according to the ISHAGE rules)                   | $\frac{(\# \text{ viable CD45}^{dim} \text{ CD117}^+ (\text{CD184}^+) \text{ events})}{(\# \text{ living events})} \times 100 \%$                |     |

|                         |        |           |                |                                                                                                                                                   |                                                                                                                                       |     |
|-------------------------|--------|-----------|----------------|---------------------------------------------------------------------------------------------------------------------------------------------------|---------------------------------------------------------------------------------------------------------------------------------------|-----|
| CD117_34<br>_PB_EPC_IHG |        |           |                | Frequency of the CD34 <sup>+</sup> cell subpopulation within viable CD117 <sup>+</sup> region (estimated according to the ISHAGE rules)           | $\frac{(\# \text{ viable CD45}^{\text{dim}} \text{ CD117}^+(\text{CD34}^+)\text{events})}{(\# \text{ living events})} \times 100 \%$  |     |
| CD117_309_PB_EPC_IHG    |        |           |                | Frequency of the CD309 <sup>+</sup> cell subpopulation within viable CD117 <sup>+</sup> region (estimated according to the ISHAGE rules)          | $\frac{(\# \text{ viable CD45}^{\text{dim}} \text{ CD117}^+(\text{CD309}^+)\text{events})}{(\# \text{ living events})} \times 100 \%$ |     |
| CD133_PB_EPC_IHG        |        |           |                | Frequency of the viable CD133 <sup>+</sup> cells (estimated according to the ISHAGE rules)                                                        | $\frac{(\# \text{ viable CD45}^{\text{dim}} \text{ CD133}^+\text{events})}{(\# \text{ living events})} \times 100 \%$                 |     |
| CD34N_CD133_PB_EPC_IHG  |        |           |                | Frequency of the viable CD133 <sup>+</sup> cells (estimated according to the ISHAGE rules) within CD45 <sup>dim</sup> CD34 <sup>-</sup> region    | $\frac{(\# \text{ viable CD45}^{\text{dim}} \text{ CD34}^-(\text{CD133}^+)\text{events})}{(\# \text{ living events})} \times 100 \%$  |     |
| CD34_CD133N_PB_EPC_IHG  |        |           |                | Frequency of the viable cells lacking CD133 antigen (estimated according to the ISHAGE rules) within CD45 <sup>dim</sup> CD34 <sup>-</sup> region | $\frac{(\# \text{ viable CD45}^{\text{dim}} \text{ CD34}^+(\text{CD133}^-)\text{events})}{(\# \text{ living events})} \times 100 \%$  |     |
| CD133_184_PB_EPC_IHG    |        |           |                | Frequency of the CD184 <sup>+</sup> cell subpopulation within viable CD133 <sup>+</sup> region (estimated according to the ISHAGE rules)          | $\frac{(\# \text{ viable CD45}^{\text{dim}} \text{ CD133}^+(\text{CD184}^+)\text{events})}{(\# \text{ living events})} \times 100 \%$ |     |
| CD133_309_PB_EPC_IHG    |        |           |                | Frequency of the CD309 <sup>+</sup> cell subpopulation within viable CD133 <sup>+</sup> region (estimated according to the ISHAGE rules)          | $\frac{(\# \text{ viable CD45}^{\text{dim}} \text{ CD133}^+(\text{CD309}^+)\text{events})}{(\# \text{ living events})} \times 100 \%$ |     |
| CD133_117_PB_EPC_IHG    |        |           |                | Frequency of the CD117 <sup>+</sup> cell subpopulation within viable CD133 <sup>+</sup> region (estimated according to the ISHAGE rules)          | $\frac{(\# \text{ viable CD45}^{\text{dim}} \text{ CD133}^+(\text{CD117}^+)\text{events})}{(\# \text{ living events})} \times 100 \%$ |     |
| CD146_PB_CEC            | MNC PB | ASS I-III | Flow cytometry | Frequency of the viable CD146 <sup>+</sup> region within viable CD45 <sup>+</sup> cells                                                           | $\frac{(\# \text{ viable CD45}^+ \text{ CD146}^+\text{events})}{(\# \text{ living events})} \times 100 \%$                            | [%] |

|                                        |                                                           |                                                                                                                                           |                                                                                                                                                            |
|----------------------------------------|-----------------------------------------------------------|-------------------------------------------------------------------------------------------------------------------------------------------|------------------------------------------------------------------------------------------------------------------------------------------------------------|
| CD105_PB<br>_CEC                       | Panel: Circulating<br>endothelial cells<br>(CEC)<br><br>7 | Frequency of the viable CD105 <sup>+</sup> region<br>within viable CD45 <sup>+</sup> cells                                                | $\frac{(\# \text{ viable CD45}^+ \text{ CD105}^+ \text{ events})}{(\# \text{ living events})} \times 100 \%$                                               |
| CD31_PB<br>_CEC                        |                                                           | Frequency of the viable CD31 <sup>+</sup> region                                                                                          | $\frac{(\# \text{ viable CD45}^+ \text{ CD31}^+ \text{ events})}{(\# \text{ living events})} \times 100 \%$                                                |
| CD45N_<br>105_34_<br>146_31_<br>PB_CEC |                                                           | Frequency of the viable CD45 <sup>-</sup> CD105 <sup>+</sup><br>CD34 <sup>+</sup> CD146 <sup>+</sup> CD31 <sup>+</sup> cells              | $\frac{(\# \text{ viable CD45}^- \text{ CD105}^+ \text{ CD34}^+ \text{ CD146}^+ \text{ CD31}^+ \text{ events})}{(\# \text{ living events})} \times 100 \%$ |
| CD31_105<br>_PB_CEC                    |                                                           | Frequency of the CD105 <sup>+</sup> cell<br>subpopulation within viable<br>CD45 <sup>+</sup> CD31 <sup>+</sup> region                     | $\frac{(\# \text{ viable CD45}^+ \text{ CD31}^+ (\text{CD105}^+) \text{ events})}{(\# \text{ living events})} \times 100 \%$                               |
| CD31_14N<br>_PB_CEC                    |                                                           | Frequency of the CD14 <sup>-</sup> cell<br>subpopulation within viable CD45 <sup>+</sup><br>CD31 <sup>+</sup> region                      | $\frac{(\# \text{ viable CD45}^+ \text{ CD31}^+ (\text{CD14}^-) \text{ events})}{(\# \text{ living events})} \times 100 \%$                                |
| CD45_133<br>_146_PB_<br>CEC            |                                                           | Frequency of the CD146 <sup>+</sup> cell<br>subpopulation within viable CD45 <sup>+</sup><br>CD133 <sup>+</sup> region                    | $\frac{(\# \text{ viable CD45}^+ \text{ CD133}^+ (\text{CD146}^+) \text{ events})}{(\# \text{ living events})} \times 100 \%$                              |
| CD45_133<br>_105_PB_<br>CEC            |                                                           | Frequency of the CD105 <sup>+</sup> cell<br>subpopulation within viable CD45 <sup>+</sup><br>CD133 <sup>+</sup> region                    | $\frac{(\# \text{ viable CD45}^+ \text{ CD133}^+ (\text{CD105}^+) \text{ events})}{(\# \text{ living events})} \times 100 \%$                              |
| CD45_133<br>_31_PB_<br>CEC             |                                                           | Frequency of the CD31 <sup>+</sup> cell<br>subpopulation within viable CD45 <sup>+</sup><br>CD133 <sup>+</sup> region                     | $\frac{(\# \text{ viable CD45}^+ \text{ CD133}^+ (\text{CD31}^+) \text{ events})}{(\# \text{ living events})} \times 100 \%$                               |
| CD45_133<br>_146_105_<br>PB_CEC        |                                                           | Frequency of the CD146 <sup>+</sup> CD105 <sup>+</sup> cell<br>subpopulation within viable CD45 <sup>+</sup><br>CD133 <sup>+</sup> region | $\frac{(\# \text{ viable CD45}^+ \text{ CD133}^+ (\text{CD146}^+ \text{ CD105}^+) \text{ events})}{(\# \text{ living events})} \times 100 \%$              |
| CD45_133<br>_146_31_<br>PB_CEC         |                                                           | Frequency of the CD146 <sup>+</sup> CD31 <sup>+</sup> cell<br>subpopulation within viable CD45 <sup>+</sup><br>CD133 <sup>+</sup> region  | $\frac{(\# \text{ viable CD45}^+ \text{ CD133}^+ (\text{CD146}^+ \text{ CD31}^+) \text{ events})}{(\# \text{ living events})} \times 100 \%$               |

|                                                      |          |           |                                                                                                                                                                         |                                                                                                                                                                                                                                                                 |     |                                                                                            |
|------------------------------------------------------|----------|-----------|-------------------------------------------------------------------------------------------------------------------------------------------------------------------------|-----------------------------------------------------------------------------------------------------------------------------------------------------------------------------------------------------------------------------------------------------------------|-----|--------------------------------------------------------------------------------------------|
| CD45_133_31_105_PB_CEC                               | MNC PB   | ASS I-III | Frequency of the CD31 <sup>+</sup> CD105 <sup>+</sup> cell subpopulation within viable CD45 <sup>+</sup> CD133 <sup>+</sup> region                                      | $\frac{(\# \text{ viable CD45}^+ \text{ CD133}^+ (\text{CD31}^+ \text{CD105}^+) \text{ events})}{(\# \text{ living events})} \times 100 \%$                                                                                                                     | [%] |                                                                                            |
| CD45_133_34_146_PB_CEC                               |          |           | Frequency of the CD146 <sup>+</sup> cell subpopulation within viable CD45 <sup>+</sup> CD133 <sup>+</sup> CD34 <sup>+</sup> region                                      | $\frac{(\# \text{ viable CD45}^+ \text{ CD133}^+ \text{ CD34}^+ (\text{CD146}^+) \text{ events})}{(\# \text{ living events})} \times 100 \%$                                                                                                                    |     |                                                                                            |
| CD45_133_34_105_PB_CEC                               |          |           | Frequency of the CD105 <sup>+</sup> cell subpopulation within viable CD45 <sup>+</sup> CD133 <sup>+</sup> CD34 <sup>+</sup> region                                      | $\frac{(\# \text{ viable CD45}^+ \text{ CD133}^+ \text{ CD34}^+ (\text{CD105}^+) \text{ events})}{(\# \text{ living events})} \times 100 \%$                                                                                                                    |     |                                                                                            |
| CD45_133_34_146_105_PB_CEC                           |          |           | Frequency of the CD146 <sup>+</sup> CD105 <sup>+</sup> cell subpopulation within viable CD45 <sup>+</sup> CD133 <sup>+</sup> CD34 <sup>+</sup> region                   | $\frac{(\# \text{ viable CD45}^+ \text{ CD133}^+ \text{ CD34}^+ (\text{CD146}^+ \text{CD105}^+) \text{ events})}{(\# \text{ living events})} \times 100 \%$                                                                                                     |     |                                                                                            |
| CD45_133_34_146_105_31_PB_CEC                        |          |           | Frequency of the CD146 <sup>+</sup> CD105 <sup>+</sup> CD31 <sup>+</sup> cell subpopulation within viable CD45 <sup>+</sup> CD133 <sup>+</sup> CD34 <sup>+</sup> region | $\frac{(\# \text{ viable CD45}^+ \text{ CD133}^+ \text{ CD34}^+ (\text{CD146}^+ \text{CD105}^+ \text{CD31}^+) \text{ events})}{(\# \text{ living events})} \times 100 \%$                                                                                       |     |                                                                                            |
| CD45_133_146_105_31_PB_CEC                           |          |           | Frequency of the CD31 <sup>+</sup> cell subpopulation within viable CD45 <sup>+</sup> CD133 <sup>+</sup> CD146 <sup>+</sup> CD105 <sup>+</sup> region                   | $\frac{(\# \text{ viable CD45}^+ \text{ CD133}^+ (\text{CD146}^+ \text{CD105}^+ \text{CD31}^+) \text{ events})}{(\# \text{ living events})} \times 100 \%$                                                                                                      |     |                                                                                            |
| CD45_133_PB_CEC                                      |          |           | Frequency of the CD133 <sup>+</sup> cell subpopulation within viable CD45 <sup>+</sup> region                                                                           | $\frac{(\# \text{ viable CD45}^+ \text{ CD133}^+ \text{ events})}{(\# \text{ living events})} \times 100 \%$                                                                                                                                                    |     |                                                                                            |
| Total CFU / 10 <sup>3</sup> CD133 <sup>+</sup> cells | CD133 SC | ASS I     | <i>In vitro</i> Endothelial differentiation capacity, Colony-forming unit endothelial cell (CFU-EC) assay<br>8                                                          | Adherent and non-adherent colonies per dish were counted after 21 days using light microscope (Leica DMIL) and 5× objective. Averages of each CFU were generated.<br><br>Total colony number (CFU) per 10 <sup>3</sup> CD133 <sup>+</sup> cells was calculated. | [n] | Ong <i>et al.</i> , 2010, Lux <i>et al.</i> , 2015 (refer for detailed medium composition) |



|                                                                       |                           |                                       |                                                                                                 |                                                                                                                                                                                                                                                                      |                                                                                                                                                                                                                                                                                                                                                                                                                                                                                                                                                                                                                                                                                          |                                                    |                                                                 |
|-----------------------------------------------------------------------|---------------------------|---------------------------------------|-------------------------------------------------------------------------------------------------|----------------------------------------------------------------------------------------------------------------------------------------------------------------------------------------------------------------------------------------------------------------------|------------------------------------------------------------------------------------------------------------------------------------------------------------------------------------------------------------------------------------------------------------------------------------------------------------------------------------------------------------------------------------------------------------------------------------------------------------------------------------------------------------------------------------------------------------------------------------------------------------------------------------------------------------------------------------------|----------------------------------------------------|-----------------------------------------------------------------|
| Number of colonies per volume of used peripheral blood                | MNC                       | ASS I-III                             | <i>In vitro</i> Endothelial differentiation capacity, Colony-forming unit (CFU-Hill) assay<br>9 |                                                                                                                                                                                                                                                                      | At day 5, positive colonies defined as a central core of “round cells” with more elongated “sprouting” cells at the periphery were counted per $1 \times 10^6$ cells and normalized to the full blood volume (mL).                                                                                                                                                                                                                                                                                                                                                                                                                                                                       | [n / mL]                                           | Hill <i>et al.</i> , 2003,<br><br>Donndorf <i>et al.</i> , 2015 |
| Number of nuclei per $\text{mm}^2$ of the plug area                   | CD133 <sup>+</sup> or MNC | ASS I (CD 133)<br><br>ASS I-III (MNC) | <i>In vivo</i> Angiogenesis assay, Matrigel™ plug assay, Morphology (H&E)<br>10                 | The federal animal care committee of LALLF Mecklenburg-Vorpommern (Germany) approved the study protocol (approval number LALLF M-V/TSD/7221.3-1.1-001/12).                                                                                                           | Total nuclei number and CD31 <sup>+</sup> cells were counted by blinded investigators within the plug area and presented per $1 \text{ mm}^2$ area. Additionally, numbers of newly formed vessels were counted and normalized per $1 \text{ mm}^2$ plug area as well as ratio of the capillaries area to the entire plug area was calculated.                                                                                                                                                                                                                                                                                                                                            | [n / $\text{mm}^2$ ]                               |                                                                 |
| Number of CD31 <sup>+</sup> cells per $\text{mm}^2$ of the plug area  |                           |                                       |                                                                                                 |                                                                                                                                                                                                                                                                      |                                                                                                                                                                                                                                                                                                                                                                                                                                                                                                                                                                                                                                                                                          | [n / $\text{mm}^2$ ]                               |                                                                 |
| Number of capillaries per $\text{mm}^2$ of the plug area              |                           |                                       |                                                                                                 |                                                                                                                                                                                                                                                                      |                                                                                                                                                                                                                                                                                                                                                                                                                                                                                                                                                                                                                                                                                          | [n / $\text{mm}^2$ ]                               |                                                                 |
| Capillary area per $\text{mm}^2$ field of view (the entire plug area) |                           |                                       |                                                                                                 |                                                                                                                                                                                                                                                                      |                                                                                                                                                                                                                                                                                                                                                                                                                                                                                                                                                                                                                                                                                          | [ $\text{mm}^2$ / $\text{mm}^2$ ]<br>$\text{mm}^2$ |                                                                 |
| VEGF, IP-10, IL-6                                                     | Serum                     | ASS I-III                             | Cytometric Bead Array (CBA) using flow cytometer<br><br>11                                      | In case of internal patients (Rostock) sera were processed after whole blood donation (centrifugation, storage of aliquots $-80 \text{ }^\circ\text{C}$ ). Due to longer transportation the samples from external patients were processed at the day after donation. | Concentrations for each soluble protein in test samples were generated from the standard curves created on the basis of mean fluorescence intensities (MFI) versus concentration of the specific standard sample. The standard curve with the highest $R^2$ was chosen. Various soluble proteins were multiplexed.<br><br>Therefore the MFI of the $0 \text{ pg/mL}$ standard point was defined as a background. On the basis of the manufacturer’s information following values for limit of the detection when MFI at $0 \text{ pg/mL}$ defined as a negative control were provided:<br><br>VEGF: $4.5 \text{ pg/mL}$ ; IP-10: $0.5 \text{ pg/mL}$ , IL-6: $1.6 \text{ pg/mL}$ . IL-8: | [pg / mL]                                          |                                                                 |

|                         |               |               |                                                 |  |                                                                                                                                                                                    |            |                                                              |
|-------------------------|---------------|---------------|-------------------------------------------------|--|------------------------------------------------------------------------------------------------------------------------------------------------------------------------------------|------------|--------------------------------------------------------------|
|                         |               |               |                                                 |  | 69.9 fg/mL and IL-10: 13.7 fg/mL.                                                                                                                                                  |            |                                                              |
| IL-8, IL-10             | Serum         | ASS I-III     |                                                 |  | The automatically generated concentrations with the value equal null or at lower level than the sensitivity of the assay allowed were considered as those in not detectable range. | [fg / mL]  |                                                              |
| TNF, SDF-1, SCF         | Serum         | ASS I-III     | Enzyme-linked immunosorbend assay (ELISA)<br>12 |  | Analysis was performed according to manufacturer's instruction (R&D Systems GmbH).                                                                                                 | [pg / mL]  | Kleiner <i>et al.</i> 2013                                   |
| IGF-1, IGFBP-2, IGFBP-3 |               |               |                                                 |  |                                                                                                                                                                                    | [ng / mL]  | Balcells <i>et al.</i> , 2001, Duron <i>et al.</i> , 2014    |
| Erythropoietin (EPO)    |               |               |                                                 |  |                                                                                                                                                                                    | [mIU / mL] | Chatterjee <i>et al.</i> , 2000, Wenzel <i>et al.</i> , 2011 |
| Vitronectin             |               |               |                                                 |  |                                                                                                                                                                                    | [µg / mL]  | Boyd <i>et al.</i> , 1993, Aslan <i>et al.</i> , 2014        |
| Anti-CMV_IgG            | Serum, plasma | ASS I and III | ELISA<br>13                                     |  | Analyses were performed by the accredited laboratory (DIN EN ISO 15189) Institute for Medical Microbiology Virology and Hygiene, Rostock University Medical Center                 | [U / mL]   |                                                              |
| Anti-EBV_VCA_IgG        |               |               |                                                 |  |                                                                                                                                                                                    | [U / mL]   |                                                              |
| Anti-EBV_EA_IgG         |               |               |                                                 |  |                                                                                                                                                                                    | [U / mL]   |                                                              |
| Anti-EBV_EBNA_IgG       |               |               |                                                 |  |                                                                                                                                                                                    | [U / mL]   |                                                              |
| Anti-Parvo              |               |               |                                                 |  |                                                                                                                                                                                    | [IU / mL]  | Rohayem                                                      |

|                          |                          |                  |                                                     |  |                                                                                                                                                                                                                                                                                                                                                                                                                                               |                      |                                                        |
|--------------------------|--------------------------|------------------|-----------------------------------------------------|--|-----------------------------------------------------------------------------------------------------------------------------------------------------------------------------------------------------------------------------------------------------------------------------------------------------------------------------------------------------------------------------------------------------------------------------------------------|----------------------|--------------------------------------------------------|
| _IgG                     |                          |                  |                                                     |  |                                                                                                                                                                                                                                                                                                                                                                                                                                               | mL]                  | <i>et al.</i> , 2001,<br>Knöll <i>et al.</i> ,<br>2002 |
| Anti-<br>CMV_IgM         |                          |                  |                                                     |  |                                                                                                                                                                                                                                                                                                                                                                                                                                               | -                    |                                                        |
| Anti-<br>EBV_VCA<br>_IgM |                          |                  |                                                     |  |                                                                                                                                                                                                                                                                                                                                                                                                                                               | [U /<br>mL]          |                                                        |
| Anti-Parvo<br>_IgM       |                          |                  |                                                     |  |                                                                                                                                                                                                                                                                                                                                                                                                                                               | [U /<br>mL]          |                                                        |
| CMV_<br>DNA              | Serum,<br>plasma         | ASS I<br>and III | Real Time-Polymerase<br>chain reaction (RT-<br>PCR) |  |                                                                                                                                                                                                                                                                                                                                                                                                                                               | [Copi<br>es /<br>mL] | Lundberg<br><i>et al.</i> , 2006                       |
| Parvo_<br>DNA            |                          |                  | 14                                                  |  |                                                                                                                                                                                                                                                                                                                                                                                                                                               |                      |                                                        |
| SH2B3                    | Whole<br>blood<br>(EDTA) | ASS I            | RT-PCR                                              |  |                                                                                                                                                                                                                                                                                                                                                                                                                                               |                      |                                                        |
|                          |                          |                  | 15                                                  |  | Measurement of RNA Integrity Number (RIN) using the Agilent 2100 Bioanalyzer. Samples with RIN $\geq 7$ were used for further experiments.<br><br>Measurement of RNA concentration and purity using the NanoDrop 1000.<br><br>The two endogenous normalization controls POLR2A TaqMan® Gene Expression Assay (Hs00172187_m1, Thermo Fisher Scientific) and GAPDH (4326317E, Thermo Fisher Scientific) were used for $\Delta\Delta CT$ method. |                      |                                                        |

### Appendix 3: List of biomarkers, analytical methods and units.

Bone marrow (BM) and peripheral blood (PB) samples were analyzed using the following methods; SC (stem cells). ASS I = pre OP, ASS IIa = 1d post OP, ASS IIb = 3d post OP, ASS III = 10 d.

<sup>1</sup> MACS® technology

<sup>2</sup> Samples were characterized regarding their hematopoietic phenotype (CD45, CD133, CD34) and using the antibodies: anti-CD133-phycoerythrin (PE) (293C2), anti-CD34-fluorescein isothiocyanate (FITC) (AC136) (both mouse anti-human, Miltenyi Biotec GmbH), and anti-CD45-allophycyanin-H7 (APC-H7) (HI30)(mouse anti-human, Becton Dickinson (BD) Biosciences). 10  $\mu$ L of un-diluted BM and 10<sup>5</sup> of purified CD133+ cell samples, respectively were suspended in MACS® buffer (PBS containing 2 mM EDTA, 0.5 % bovine serum albumin (BSA, Sigma-Aldrich Chemie GmbH)). FcR blocking reagent (Miltenyi Biotec GmbH) was added to reduce unspecific bindings. Subsequently, cells were incubated with antibodies for 10 min in the dark at 4 °C. To distinguish viable from dead cells, 7-Amino-Actinomycin (7-AAD) staining solution (BD) was used. Whereas to BM probe 1 mL of red blood lysis buffer (eBioscience) was added, CD133 samples were incubated with 1 mL cold PBS. After 10 min incubation on ice, probes were washed once at 300 $\times$ g/ 4 °C for 10 min, resuspended in 200  $\mu$ L PBS and measured with BD  $\square$  LSRII flow cytometer (BD). The analysis was performed using BD FACS Diva Software (version 6.1.2, BD).

<sup>3</sup> Two samples from batch of the purified BM CD133<sup>+</sup> containing each 3×10<sup>4</sup> cells were taken for stemness characterization. After addition of the fixed amount of antibodies, the remaining volume to up volume of 50 μL was filled with MACS® buffer. After the incubation time, cells were washed once and acquired on flow cytometer. Following antibodies were always added to both samples: anti-CD34-FITC (AC136) (Miltenyi Biotec GmbH), anti-CD133-PE (293C2) (Miltenyi Biotec GmbH), anti-CD117-PE-Cy7 (104D2) (BD), anti-CD45-AmCyan (HI30) (BD), and anti-CD14-PacificBlue (MφP9) (BD). For APC-channel either anti-CD184 (CXCR4) (12G5)(BD) or anti-CD309 (VEGFR2/KDR) (ES8-20E6) (Miltenyi Biotec GmbH) was added. To distinguish living cells from dead cells, 7-AAD dye was utilized. As for QC the analysis of CD34+CD133+SC was performed in accordance with an internal adapted ISHAGE protocol. Additionally, dependent on probe staining, following sub-populations were characterized within this region: a) CD117<sup>+</sup>, b) CD309<sup>+</sup>, c) CD184<sup>+</sup>, d) CD117<sup>+</sup>CD309<sup>+</sup>, e) CD117<sup>+</sup>CD184<sup>+</sup> and f) CD14<sup>+</sup>

4 Density gradient centrifugation was performed to isolate MNC from PB.

5 Cells were suspended in cold PBS, FcR blocking reagent (Miltenyi Biotec GmbH) and appropriate antibodies (see below) were added. To distinguish dead from living cells LIVE/DEAD™ Fixable Near-IR Dead Cell Stain Kit (Thermo Fisher Scientific GmbH) was used. Following incubation at 4 °C for 30 min, cells were washed once with PBS at 300×g for 10 min at 4 °C, suspended in 300 μL PBS and acquired immediately on BD FACS LSRII flow cytometer (BD). The analysis was performed using FACS Diva Software (BD). For calculation of concentration of the respective subpopulations total cell number of viable MNC was obtained from counting method using trypan blue dye.

6 Antibodies/dyes used for multicolor staining (8-fold) to enumerate various endothelial progenitor cell (EPC) subset within mononuclear cells isolated from peripheral blood: a) anti-CD34-FITC (AC136); Mouse isotype control: IgG<sub>2a</sub> (Miltenyi Biotec GmbH), b) anti-CD133/2-PE (293C3); Mouse isotype control: IgG<sub>2b</sub> (Miltenyi Biotec GmbH), c) anti-CD184-PE-Cy5 (12G5); Mouse isotype control: IgG<sub>2a</sub>, κ (BD), d) anti-CD117-PE-Cy7 (104D2); Mouse isotype control: IgG<sub>1</sub>, κ (BD), e) anti-CD309-APC (ES8-20E6); Mouse isotype control: IgG<sub>1</sub>, κ (Miltenyi Biotec GmbH), f) near-IR fluorescence dye-APC-Cy7 (Thermo Fisher Scientific GmbH), g) anti-CD14- Pacific Blue (V450) (MφP9); Mouse isotype control: IgG<sub>2b</sub>, κ, (BD), and h) anti-CD45-AmCyan (V500) (HI30); Mouse isotype control: IgG<sub>1</sub>, κ (BD)

7 List of antibodies/dyes used for multicolor staining (8-fold) to enumerate various circulating endothelial cell (EPC) subsets within mononuclear cells isolated from PB: a) anti-CD31-FITC (WM59) Mouse isotype control: IgG1, κ (BD), b) anti-CD133- PE (293C3) Mouse isotype control: IgG2b (Miltenyi Biotec GmbH), c) anti-CD146- Biotin; Mouse isotype control: IgG1 (both (Miltenyi Biotec GmbH) and secondary antibody streptavidin- PerCP-Cy5.5 (BD), d) anti-CD34- PE-Cy7 (8G12) Mouse isotype control: IgG1, κ (BD), e) anti-CD105- Alexa Fluor-647 (APC) (SN6) Mouse isotype control: IgG1 (AbD Serotec), f) near-IR fluorescence dye-APC-Cy7 (Thermo Fisher Scientific GmbH), g) anti-CD14- Pacific Blue (V450) (MφP9) Mouse isotype control: IgG2b, κ, (BD), and h) anti-CD45- AmCyan (V500) (HI30) Mouse isotype control: IgG1, κ (BD)

8 1×10<sup>3</sup> CD133<sup>+</sup> cells were plated in triplicates on a 35 mm dish in supplemented MethoCult SF H4236 (both from StemCell Technologies Inc.) and incubated under standardized conditions 37 °C, 5 % CO<sub>2</sub> at humidity > 80% for 21 days.

9 CFU-Hill assays were performed in triplicates in accordance with Hill *et al.* (2003) and following the manufacturer's instructions using CFU-Hill Liquid medium (StemCell Technologies Inc.). In brief, 5×10<sup>6</sup> MNC were plated per one 35mm fibronectin-coated dish. After three days, non-adherent cells were collected, counted using methylene blue dye (Stem Cell technologies Inc.) and re-plated at the density 1×10<sup>6</sup> cells per fibronectin -coated 24 well plate.

10 Severe Combined Immunodeficiency mice (CB17-Prkdcscid/J) were purchased from Charles River Laboratories. SCID mice (female, 22±2 g) were randomly assigned to five groups with Matrigel™ (BD Matrigel Matrix Growth Factor Reduced, Phenol Red-Free, (BD)) injection containing either 1×10<sup>5</sup> of CD133+ SC manually isolated from iliac crest biopsy before CABG therapy (133pre, n=(13/8 [H/E]) or MNC isolated from PB (PBMNC) withdrawn before CABG therapy (MNCpre, n=13/14 [H/E]), PBMNC applied 24 h post CABG therapy (MNC24h, n=12/11 [H/E]), PBMNC applied 72 h post CABG therapy (MNC72h, n=15/12 [H/E]) and PBMNC applied 10 d post CABG therapy (MNC10d, n=14/10 [H/E]). Mice were anesthetized with intraperitoneal injection of Ketamin/Xylazin (75/25 mg/kg). Matrigel™ was injected subcutaneously in abdominal wall through 1 mL syringe with 26 G needle (B.

Braun). Mice were sacrificed 14 d post injection by cervical dislocation and Matrigel™ plug was carefully removed. The plug with cells was harvested together with abdominal muscle and skin, fixed in 4 % neutral buffered formalin (FormaFix, Grimm MED. Logistik GmbH), embedded in paraffin. Formalin-fixed paraffin embedded plugs were pseudonymized and sectioned at 10 µm thickness using Mikrotom Hyrax M55 (Carl Zeiss GmbH). Following deparaffinization and dehydration steps, some sections were stained with Hematoxylin Meyer and 0.25 % Eosin (both Sigma-Aldrich Chemie GmbH) for further morphological examination (nuclei, vessel-like structures), otherwise, some sections were boiled in 10 mM citrate buffer for 10 min for antigen retrieval, blocked with DAKO Serum-free block (DAKO Cytomation) 1h at RT, further stained with primary polyclonal goat anti-CD31 antibody (1.25, sc-1506; Santa Cruz Technologies Inc.) overnight at 4 °C and visualized with donkey anti-goat Alexa Fluor 488 (1:250, Thermo Fisher Scientific GmbH) for 2 h at 37 °C. Plugs were counterstained with 5 µM TO-PRO-3 Iodide (Thermo Fisher Scientific GmbH) for nuclei. Random images within plug area were taken with ELYRA PS.1 confocal scanning microscope using 40 × objectives and analyzed with ZEN 2011 software (blue edition, both from Carl Zeiss).

11 Estimation of cytokine levels in serum: Concentrations of VEGF, IL-6 and IP-10 in patient's sera samples were measured using BD™ Cytometric Bead Array (CBA) Human Soluble Protein Master Buffer Kit (BD) according to the manufacturer's instruction. These three BD™ CBA Soluble Protein Flex Set Assays (BD) composed of standards, capture beads and PE-detections reagents were multiplexed. Frozen sera samples were thawed and diluted 1/4 in Assay Diluent. Lyophilized standards were diluted appropriately giving an assay range for each soluble protein at minimum of 10 pg/mL until 'TOP' 2,500 pg/mL. Following one hour incubation step to ensure binding of capture beads with recognized analytes in samples and standards, visualisation of formed complexes was ensured by addition of PE-conjugated detection reagent for another 2 h. Triplicates either of test samples or standards were measured using BD LSR II flow cytometer (BD) equipped with BD FACS Diva software. The transferred raw data (FCS 2.0) were further analysed by FCAP Array™ software 3.0 (BD). Concentrations (fg/mL) of IL-8 and IL-10 in patient's sera samples, collected at certain time points, were measured by BD™ CBA Human Enhanced Sensitivity Master Buffer Kit according to the manufacturer's instruction. Both BD™ CBA Soluble Protein Enhanced Sensitivity Flex Sets (BD) composed of standards, capture beads and detection reagents (Part A) were multiplexed. Frozen sera were thawed and diluted at 1/3 with Assay Diluent. Lyophilized standards provided in the kit were diluted appropriately giving an assay range for each soluble protein at minimum of 274 fg/mL until 'TOP' 200,000 fg/mL. Samples were incubated with capture beads (2 h) followed by another incubation steps with detection reagents A and B (each 2 h).

12 ELISA were conducted in triplicates. OD values were generated at 450 nm wavelength using Tecan Infinite® M200 device with Tecan i-control, 1.9.17.0 software (both from Tecan Group Ltd.). Frozen sera samples were thawed and prepared following the manufacturers' instructions (R&D Systems GmbH). Created standard curves were used to determine each protein concentration. For adequate ELISA performance patient samples were diluted considering detection limits provided by the manufacturer, literature ranges and internal laboratory experience: TNF, SDF-1 and EPO: un-diluted, IGF-1 and IGFBP-3 1:100, IGFBP-2 1:50, Vitronectin 1:10 and SCF 1:3.

13 Native samples of PB serum or plasma were used for semi-quantitative Immunoassays using the Immunomat™ system (Institute Virion\Serion GmbH).

14 Native samples of peripheral blood (EDTA blood) were used for quantitative Real Time-PCR using LightCycler 480 II (Roche Deutschland Holding GmbH).

15 Isolation of RNA from 1 ml whole blood aliquots (stored at -80 °C) was performed using the GeneJET Stabilized and Fresh Whole Blood RNA Kit (Thermo Fisher Scientific). Reverse transcription was performed using the High-Capacity cDNA Reverse Transcription Kit (Thermo Fisher Scientific). RT-PCR was performed using the StepOnePlus RT PCR System (Applied Biosystems™). cDNA (30 ng for each reaction), TaqMan® Universal PCR Master Mix (Thermo Fisher Scientific) and SH2B3 TaqMan® Gene Expression Assay (Hs01081959\_g1, Thermo Fisher Scientific) were used. Three technical replicates were performed. To calculate the relative expression ratio of SH2B3 the  $\Delta\Delta CT$  method was applied.

## References:

- Aslan S, Ikitimur B, Cakmak HA, Karadag B, Tufekcioglu EY, Ekmekci H, Yuksel H. Prognostic utility of serum vitronectin levels in acute myocardial infarction. *Herz*. 2015 Jun;40(4):685-9. doi: 10.1007/s00059-014-4105-2. Epub 2014 May 15.
- Balcells J, Moreno A, Audí L, Roqueta J, Iglesias J, Carrascosa A. Growth hormone/insulin-like growth factors axis in children undergoing cardiac surgery. *Crit Care Med*. 2001 Jun;29(6):1234-8.
- Boyd NA, Bradwell AR, Thompson RA. Quantitation of vitronectin in serum: evaluation of its usefulness in routine clinical practice. *J Clin Pathol*. 1993 Nov;46(11):1042-5.
- Chatterjee B, Nydegger UE, Mohacsi P. Serum erythropoietin in heart failure patients treated with ACE-inhibitors or AT(1) antagonists. *Eur J Heart Fail*. 2000 Dec;2(4):393-8.
- Donndorf P, Lube L, Lux C, Skorska A, Steinhoff G, Kraft K. Mobilization of Bone Marrow-Derived Endothelial Progenitor Cells following Finnish Sauna: A Pilot Study. *Forsch Komplementmed*. 2015;22(4):246-50. doi: 10.1159/000438956.
- Duron E, Vidal JS, Funalot B, Brunel N, Viollet C, Seux ML, Treluyer JM, Epelbaum J, Bouc YL, Hanon O. Insulin-like growth factor I, insulin-like growth factor binding protein 3, and atrial fibrillation in the elderly. *J Gerontol A Biol Sci Med Sci*. 2014 Aug;69(8):1025-32. doi: 10.1093/gerona/glt206. Epub 2013 Dec 24.
- Hill JM, Zalos G, Halcox JP, Schenke WH, Waclawiw MA, Quyyumi AA, Finkel T. Circulating endothelial progenitor cells, vascular function, and cardiovascular risk. *N Engl J Med*. 2003 Feb 13;348(7):593-600.
- Kleiner G, Marcuzzi A, Zanin V, Monasta L, Zauli G. Cytokine levels in the serum of healthy subjects. *Mediators Inflamm*. 2013;2013:434010. doi: 10.1155/2013/434010. Epub 2013 Mar 7.
- Knöll A, Louwen F, Kochanowski B, Plentz A, Stüssel J, Beckenlehner K, Jilg W, Modrow S. ParvovirusB19 infection in Pregnancy: Quantitative viral DNA analysis using a kinetic fluorescence detection system (TaqMan PCR) (2002). *J. Med. Virol*. 67: 259-266
- Laupheimer M, Skorska A, Große J, Tiedemann G, Steinhoff G, David R, Lux CA. Selective Migration of Subpopulations of Bone Marrow Cells along an SDF-1 $\alpha$  and ATP Gradient. *Bone Marrow Res*. 2014;2014:182645. doi: 10.1155/2014/182645.
- Lundberg R, Brytting M, Dahlgren L, Kanter-Lewensohn L, Schloss L, Dalianis T, Ragnarsson-Olding B. Human herpes virus DNA is rarely detected in non-UV light-associated primary malignant melanomas of mucous membranes. *Anticancer Res* 2006, 26, 3627-31.
- Lux CA Mark P, Klopsch C, Laupheimer M, Tu-Rapp H, Li W, Ma N, Steinhoff G, David R. Impact of short-term liquid storage on human CD133(+) stem cells. *Cell Transplant*. 2015;24(11):2409-22. doi: 10.3727/096368914X681577.

Mueller P, Voronina N, Hausburg F, Lux CA, Wiekhorst F, Steinhoff G, David R. Magnet-Bead Based MicroRNA Delivery System to Modify CD133+ - Stem Cells STEM CELLS INT 2016; 2016:7152761

Ong LL, Li W, Oldigs JK, Kaminski A, Gerstmayer B, Piechaczek C, Wagner W, Li RK, Ma N, Steinhoff G. Hypoxic/normoxic preconditioning increases endothelial differentiation potential of human bone marrow CD133+ cells. Tissue Eng Part C Methods. 2010 Oct;16(5):1069-81. doi: 10.1089/ten.TEC.2009.0641.

Rohayem J, Dinger J, Fischer R, Klingel K, Kandolf R, Rethwilm A. Fatal Myocarditis with acute ParvovirusB19 and Human Herpesvirus 6 coinfection (2001). J. Clin Microbiol.

Skorska A, Müller P, Gaebel R, Große J, Lemcke H, Lux CA, Bastian M, Hausburg F, Zarniko N, Bubritzki S, Ruch U, Tiedemann G, David R, Steinhoff G. GMP-conformant on-site manufacturing of a CD133+ stem cell product for cardiovascular regeneration. Stem Cell Res Ther. 2017 Feb 10;8(1):33. doi: 10.1186/s13287-016-0467-0.

Sutherland DR, Anderson L, Keeney M, Nayar R, Chin-Yee I. The ISHAGE guidelines for CD34+ cell determination by flow cytometry. J Hematother. 1996 Jun;5(3):213-26.

Wenzel F, Gettmann T, Zimmermann N, Giers G. Alterations of serum erythropoietin and thrombopoietin levels in patients undergoing Coronary Artery Bypass Grafting (CABG). Clin Hemorheol Microcirc. 2011;49(1-4):399-406. doi: 10.3233/CH-2011-1489.
